# Supplementary material for: Using ICD-10 Diagnostic Codes to Identify ‘Missing’ Paediatric Patients During Nationwide COVID-19 Lockdown in Oxfordshire, UK
Source: Research Square preprint supplement (doi:10.21203/rs.3.rs-263991/v1), 2021-03-11
Supplement: Supplementary file 1 [file fe71f4a8a488e9f9b7eef0b2.docx]

**Supplemental table 1: Summary of data analysed**

| **Total period (3 weeks prior, during and 2 weeks after lockdown)** | | | | | | | |
| --- | --- | --- | --- | --- | --- | --- | --- |
|  | 2015 | 2016 | 2017 | 2018 | 2019 | 2020 | % reduction in 2020 compared to 2015-2019 (mean) |
| ED attendances | 7171 | 7550 | 7363 | 7322 | 7828 | 4030 | 45.9% |
| Admissions | 2236 | 2520 | 2440 | 2639 | 2623 | 1416 | 43.2% |
| **Lockdown period (7 weeks)** | | | | | | | |
|  | 2015 | 2016 | 2017 | 2018 | 2019 | 2020 | % reduction in 2020 compared to 2015-2019 (mean) |
| ED attendances | 4126 | 4199 | 4209 | 4116 | 4334 | 1703 | 59.4% |
| Admissions | 1237 | 1409 | 1379 | 1463 | 1460 | 593 | 57.3% |
| Diagnoses * | 3767 | 3467 | 3700 | 4402 | 4610 | 2843 | 28.7% |
| ** Diagnoses included in analyses of individual diagnoses  (occurring mean ≥1 2015-2019 or ≥1 in 2020) | 3405 | 3062 | 3300 | 3931 | 4151 | 2843 | 20.4% |
| No diagnosis given | 2 (0.16%) | 0 | 7 (0.51%) | 2 (0.14%) | 9 (0.62%) | 6 (1.01%) |  |

Summary of data collected and analysed for this article are shown. Data were extracted from ED attendances and emergency (non-elective) admissions over the full study periods (02/03/2015-26/05/2015, 07/03/2016-24/05/2016, 06/03/2017-23/05/2017, 05/03/2018-29/05/2018, 04/03/2019-28/05/2019 and 02/03/2020-26/05/2020). The 2020 dates include 3 weeks prior to the first full national UK lockdown, and 2 weeks after. The matched dates in 215-2019 include the same numbers of weekdays and weekends. The first 2020 lockdown period is taken as 23/03/2020-12/05/2020, the matched 49 days for 2015-2019 begin on 23/03/2015, 28/03/2016, 27/03/2017, 26/03/2018 and 25/03/2019. * All diagnoses were included the analysis of diagnoses for ICD-10 chapter headings, including the primary diagnosis. ** To excluded diagnoses made rarely over the five previous years, we excluded diagnoses made a median of <1 in 2015-2019, but all diagnoses made ≥1 times in 2020.

**Supplemental table 2: Discharge diagnoses by ICD-10 chapter headings**

| **ICD-10 Chapter heading** | **Median (range) weekly admissions 2015-2019**  **(n=35)** | **Median (range) weekly admissions 2020**  **(n=7)** | **P value** |
| --- | --- | --- | --- |
| Certain infectious and parasitic diseases | **46 (20-73)** | **19 (13-27)** | **0.000** |
| Neoplasms | **5 (2-14)** | **11 (4-17)** | **0.014** |
| Diseases of the blood and blood-forming organs and certain disorders involving the immune mechanism | 8 (1-16) | 7 (2-15) | 0.466 |
| Endocrine, nutritional and metabolic diseases | 8 (2-17) | 8 (5-23) | 0.341 |
| Mental, Behavioural and Neurodevelopmental disorders | 11 (3-33) | 12 (8-16) | 0.624 |
| Diseases of the nervous system | 17 (3-27) | 15 (10-20) | 0.685 |
| Diseases of the eye and adnexa | 7 (1-18) | 7 (4-13) | 0.474 |
| Diseases of the ear and mastoid process | **5 (1-15)** | **2 (0-5)** | **0.001** |
| Diseases of the circulatory system | 4 (0-10) | 4 (1-13) | 0.528 |
| Diseases of the respiratory system | **53 (30-86)** | **18 (13-43)** | **0.000** |
| Diseases of the digestive system | 28 (10-47) | 23 (10-33) | 0.108 |
| Diseases of the skin and subcutaneous tissue | **16 (5-31)** | **11 (7-15)** | **0.013** |
| Diseases of the musculoskeletal system and connective tissue | **12 (4-27)** | **6 (3-8)** | **0.000** |
| Diseases of the genitourinary system | 11 (4-23) | 14 (5-14) | 0.905 |
| Certain conditions originating in the perinatal period | 21 (7-44) | 21 (8-23) | 0.295 |
| Congenital malformations, deformations and chromosomal abnormalities | 18 (5-37) | 16 (7-33) | 0.437 |
| Symptoms, signs and abnormal clinical and laboratory findings, not elsewhere classified | **117 (37-180)** | **64 (33-99)** | **0.002** |
| Injury, poisoning and certain other consequences of external causes | **45 (27-67)** | **18 (13-34)** | **0.000** |
| External causes of morbidity | **29 (0-40)** | **14 (8-26)** | **0.014** |
| Factors influencing health status and contact with health services | **72 (9-109)** | **100 (89-147)** | **0.001** |

Diagnosis at discharge was collated under ICD-10 chapter headings for patients admitted during the 7 weeks of full national lockdown are shown as numbers admitted per week – median (and range). The chapter heading ‘Pregnancy, childbirth and the puerperium’ was excluded for too few events. ‘U’ codes (codes for special purposes) were found for COVID-19 infection (U071) and U800, U801, U808, U818, U820, U821, U822, U828, U837, U838 and U898, which were all used to identify microbial resistance to specific antibiotics. U071 was assigned the chapter ‘certain infectious and parasitic diseases’ and the remainder U codes assigned ‘factors influencing health status and contact with health services’. P value represents independent-samples Kruskal-Wallis test controlled for multiple comparisons with stepwise step-down. P values of <0.05 were taken as significant. Chapter heading ‘Certain conditions originating in the perinatal period’ is excluded due to only 1 presentation across the 6 years.

**Supplemental Table 3: Individual discharge diagnoses**

| **ICD-10 code** | **Diagnosis** | **Median (range) admissions 2015-2019** | **Admissions 2020** | **P value*** |
| --- | --- | --- | --- | --- |
| **Certain infectious and parasitic diseases** | | | | |
| A010 | Typhoid fever | 0 (0-0) | 2 | **0.0014** |
| A020 | Salmonella enteritis | 0 (0-0) | 2 | **0.0014** |
| A048 | Other specified bacterial intestinal infections | 0 (0-0) | 1 | **0.0253** |
| A084 | Viral intestinal infection, unspecified | 22 (6-30) | 1 | **0.0004** |
| A090 | Other and unspecified gastroenteritis and colitis of infectious origin | 1 (0-17) | 1 | 0.5560 |
| A099 | Gastroenteritis and colitis of unspecified origin | 46 (42-56) | 18 | **0.0009** |
| A379 | Whooping cough, unspecified | 0 (0-0) | 1 | **0.0253** |
| A38X | Scarlet fever | 4 (1-8) | 1 | 0.1135 |
| A415 | Sepsis due to other Gram-negative organisms | 0 (0-5) | 5 | **0.0021** |
| A419 | Sepsis, unspecified | 15 (4-24) | 11 | 0.4795 |
| A490 | Staphylococcal infection, unspecified site | 0 (0-2) | 2 | 0.0632 |
| A491 | Streptococcal infection, unspecified site | 1 (0-3) | 0 | 0.2424 |
| A499 | Bacterial infection, unspecified | 1 (0-3) | 0 | 0.2925 |
| A858 | Other specified viral encephalitis | 0 (0-1) | 1 | 0.2003 |
| A870 | Enteroviral meningitis | 4 (1-7) | 0 | **0.0459** |
| A878 | Other viral meningitis | 0 (0-5) | 0 | 0.4274 |
| A879 | Viral meningitis, unspecified | 1 (0-4) | 0 | 0.2432 |
| B002 | Herpesviral gingivostomatitis and pharyngotonsillitis | 1 (0-2) | 2 | 0.2424 |
| B018 | Varicella with other complications | 2 (1-5) | 0 | 0.1368 |
| B019 | Varicella without complication | 14 (3-21) | 2 | **0.0285** |
| B084 | Enteroviral vesicular stomatitis with exanthem | 1 (0-3) | 0 | 0.2424 |
| B09X | Unspecified viral infection characterized by skin and mucous membrane lesions | 1 (0-3) | 2 | 0.7488 |
| B278 | Other infectious mononucleosis | 0 (0-0) | 1 | **0.0253** |
| B279 | Infectious mononucleosis, unspecified | 1 (0-1) | 1 | 0.8333 |
| B341 | Enterovirus infection, unspecified site | 0 (0-0) | 1 | **0.0253** |
| B342 | Coronavirus infection, unspecified site | 0 (0-1) | 1 | 0.2003 |
| B348 | Other viral infections of unspecified site | 0 (0-6) | 1 | 0.8147 |
| B349 | Viral infection, unspecified | 128 (122-164) | 27 | **0.0000** |
| B369 | Superficial mycosis, unspecified | 0 (0-1) | 2 | **0.0172** |
| B370 | Candidal stomatitis | 8 (1-9) | 4 | 0.5950 |
| B372 | Candidiasis of skin and nail | 0 (0-1) | 1 | 0.4271 |
| B373 | Candidiasis of vulva and vagina | 0 (0-1) | 1 | 0.4271 |
| B379 | Candidiasis, unspecified | 1 (0-1) | 1 | 0.6423 |
| B679 | Echinococcosis, other and unspecified | 0 (0-0) | 1 | **0.0253** |
| B950 | Streptococcus, group A, as the cause of diseases classified to other chapters | 2 (0-5) | 1 | 0.4818 |
| B952 | Streptococcus, group D, as the cause of diseases classified to other chapters | 0 (0-2) | 2 | 0.1406 |
| B954 | Other streptococcus as the cause of diseases classified to other chapters | 3 (0-4) | 1 | 0.3371 |
| B956 | Staphylococcus aureus as the cause of diseases classified to other chapters | 7 (4-9) | 3 | 0.1795 |
| B957 | Other staphylococcus as the cause of diseases classified to other chapters | 0 (0-3) | 1 | 0.8333 |
| B958 | Unspecified staphylococcus as the cause of diseases classified to other chapters | 0 (0-2) | 1 | 0.4271 |
| B961 | Klebsiella pneumoniae [K. pneumoniae] as the cause of diseases classified to other chapters | 1 (0-6) | 1 | 0.6026 |
| B962 | Escherichia coli [E. coli] as the cause of diseases classified to other chapters | 16 (12-27) | 13 | 0.5590 |
| B963 | Haemophilus influenzae [H. influenzae] as the cause of diseases classified to other chapters | 1 (0-3) | 0 | 0.2931 |
| B965 | Pseudomonas (aeruginosa) as the cause of diseases classified to other chapters | 2 (0-7) | 2 | 0.9474 |
| B968 | Other specified bacterial agents as the cause of diseases classified to other chapters | 2 (1-5) | 6 | **0.0285** |
| B971 | Enterovirus as the cause of diseases classified to other chapters | 1 (0-6) | 2 | 0.6529 |
| B972 | Coronavirus as the cause of diseases classified to other chapters | 0 (0-0) | 1 | **0.0253** |
| B974 | Respiratory syncytial virus as the cause of diseases classified to other chapters | 1 (0-4) | 0 | 0.2012 |
| B978 | Other viral agents as the cause of diseases classified to other chapters | 6 (2-25) | 4 | 0.0677 |
| U071 | COVID-19, virus identified | 0 (0-0) | 5 | **0.0000** |
| **Neoplasms** | | | | |
| C181 | Malignant neoplasm: Appendix | 0 (0-0) | 1 | **0.0253** |
| C402 | Malignant neoplasm: Long bones of lower limb | 1 (0-6) | 2 | 0.7409 |
| C410 | Malignant neoplasm: Bones of skull and face | 0 (0-1) | 1 | 0.2003 |
| C414 | Malignant neoplasm: Pelvic bones, sacrum and coccyx | 0 (0-2) | 2 | 0.1406 |
| C480 | Malignant neoplasm: Retroperitoneum | 0 (0-1) | 1 | 0.2003 |
| C490 | Malignant neoplasm: Connective and soft tissue of head, face and neck | 0 (0-0) | 2 | **0.0014** |
| C64X | Malignant neoplasm of kidney, except renal pelvis | 1 (0-3) | 4 | 0.1190 |
| C716 | Malignant neoplasm: Cerebellum | 0 (0-1) | 7 | **0.0000** |
| C717 | Malignant neoplasm: Brain stem | 0 (0-2) | 1 | 0.4271 |
| C719 | Malignant neoplasm: Brain, unspecified | 2 (0-4) | 3 | 0.3441 |
| C720 | Malignant neoplasm: Spinal cord | 0 (0-0) | 2 | **0.0014** |
| C749 | Malignant neoplasm: Adrenal gland, unspecified | 0 (0-1) | 1 | 0.2003 |
| C762 | Malignant neoplasm of other and ill-defined sites: Abdomen | 0 (0-4) | 3 | **0.0244** |
| C780 | Secondary malignant neoplasm of lung | 2 (0-2) | 5 | **0.0047** |
| C787 | Secondary malignant neoplasm of liver and intrahepatic bile duct | 0 (0-1) | 1 | 0.4271 |
| C793 | Secondary malignant neoplasm of brain and cerebral meninges | 0 (0-0) | 2 | **0.0014** |
| C795 | Secondary malignant neoplasm of bone and bone marrow | 1 (0-1) | 2 | 0.2424 |
| C835 | Lymphoblastic (diffuse) lymphoma | 2 (0-3) | 0 | 0.2934 |
| C837 | Burkitt lymphoma | 1 (0-1) | 1 | 0.6423 |
| C846 | Anaplastic large cell lymphoma, ALK-positive | 0 (0-0) | 1 | **0.0253** |
| C859 | Non-Hodgkin lymphoma, unspecified | 0 (0-0) | 1 | **0.0253** |
| C910 | Acute lymphoblastic leukaemia [ALL] | 12 (8-22) | 18 | 0.4473 |
| C920 | Acute myeloblastic leukaemia [AML] | 1 (0-2) | 0 | 0.2925 |
| D180 | Haemangioma, any site | 3 (1-4) | 6 | **0.0313** |
| D225 | Melanocytic naevi of trunk | 1 (1-5) | 4 | 0.5553 |
| D226 | Melanocytic naevi of upper limb, including shoulder | 0 (0-1) | 1 | 0.2003 |
| D432 | Neoplasm of uncertain or unknown behaviour: Brain, unspecified | 0 (0-1) | 1 | 0.2003 |
| D444 | Neoplasm of uncertain or unknown behaviour: Craniopharyngeal duct | 0 (0-4) | 1 | 1.0000 |
| D471 | Chronic myeloproliferative disease | 0 (0-0) | 1 | **0.0253** |
| D473 | Essential (haemorrhagic) thrombocythaemia | 0 (0-0) | 1 | **0.0253** |
| **Diseases of the blood and blood-forming organs and certain disorders involving the immune mechanism** | | | | |
| D508 | Other iron deficiency anaemias | 2 (0-6) | 6 | 0.4137 |
| D509 | Iron deficiency anaemia, unspecified | 1 (0-4) | 3 | 0.2271 |
| D539 | Nutritional anaemia, unspecified | 0 (0-0) | 1 | **0.0253** |
| D570 | Sickle-cell anaemia with crisis | 2 (1-3) | 0 | 0.1368 |
| D571 | Sickle-cell anaemia without crisis | 3 (1-7) | 1 | 0.3276 |
| D573 | Sickle-cell trait | 2 (1-3) | 3 | 0.5629 |
| D580 | Hereditary spherocytosis | 1 (0-2) | 2 | 0.8895 |
| D582 | Other haemoglobinopathies | 0 (0-1) | 2 | 0.0632 |
| D619 | Aplastic anaemia, unspecified | 1 (0-3) | 1 | 1.0000 |
| D649 | Anaemia, unspecified | 4 (3-19) | 4 | 0.3285 |
| D66X | Hereditary factor VIII deficiency | 1 (0-4) | 1 | 0.8347 |
| D680 | Von Willebrand's disease | 0 (0-1) | 1 | 0.4271 |
| D682 | Hereditary deficiency of other clotting factors | 0 (0-4) | 0 | 0.3533 |
| D685 | Primary Thrombophilia | 0 (0-0) | 1 | **0.0253** |
| D689 | Coagulation defect, unspecified | 0 (0-2) | 1 | 0.6423 |
| D690 | Allergic purpura | 8 (5-10) | 3 | 0.0800 |
| D693 | Idiopathic thrombocytopenic purpura | 3 (1-7) | 0 | 0.0738 |
| D696 | Thrombocytopenia, unspecified | 2 (0-7) | 1 | 0.4684 |
| D70X | Agranulocytosis | 10 (7-13) | 9 | 0.8746 |
| D728 | Other specified disorders of white blood cells | 1 (0-1) | 2 | 0.1406 |
| D802 | Selective deficiency of immunoglobulin A [IgA] | 0 (0-0) | 1 | **0.0253** |
| D819 | Combined immunodeficiency, unspecified | 0 (0-4) | 4 | **0.0346** |
| D821 | Di George's syndrome | 0 (0-3) | 1 | 0.6665 |
| **Endocrine, nutritional and metabolic diseases** | | | | |
| E031 | Congenital hypothyroidism without goitre | 0 (0-1) | 1 | 0.4271 |
| E039 | Hypothyroidism, unspecified | 2 (0-4) | 2 | 0.5873 |
| E100/E101/  E103/E104/  E109 | Insulin-dependent diabetes mellitus | 10 (8-14) | 7 | 0.2630 |
| E139 | Other specified diabetes mellitus | 0 (0-1) | 6 | **0.0036** |
| E161 | Other hypoglycaemia | 0 (0-3) | 1 | 1.0000 |
| E162 | Hypoglycaemia, unspecified | 8 (6-17) | 3 | **0.0150** |
| E230 | Hypopituitarism | 3 (2-4) | 4 | 0.7247 |
| E232 | Diabetes insipidus | 0 (0-3) | 2 | 0.1406 |
| E236 | Other disorders of pituitary gland | 0 (0-0) | 1 | **0.0253** |
| E270 | Other adrenocortical overactivity | 0 (0-0) | 2 | **0.0253** |
| E274 | Other and unspecified adrenocortical insufficiency | 1 (0-3) | 4 | **0.0075** |
| E343 | Short stature, not elsewhere classified | 1 (0-2) | 1 | 1.0000 |
| E550 | Rickets, active | 1 (0-6) | 0 | 0.2931 |
| E559 | Vitamin D deficiency, unspecified | 5 (0-5) | 2 | 0.4799 |
| E669 | Obesity, unspecified | 2 (1-4) | 3 | 0.9151 |
| E739 | Lactose intolerance, unspecified | 0 (0-2) | 3 | 0.1183 |
| E833 | Disorders of phosphorus metabolism and phosphatases | 1 (0-4) | 1 | 0.5220 |
| E834 | Disorders of magnesium metabolism | 1 (0-2) | 2 | 0.2424 |
| E835 | Disorders of calcium metabolism | 1 (0-3) | 0 | 0.2424 |
| E840 | Cystic fibrosis with pulmonary manifestations | 0 (0-2) | 1 | 0.6423 |
| E848 | Cystic fibrosis with other manifestations | 0 (0-1) | 1 | 0.2003 |
| E849 | Cystic fibrosis, unspecified | 2 (0-3) | 1 | 0.7105 |
| E86X | Volume depletion | 13 (6-17) | 16 | 0.9578 |
| E870 | Hyperosmolality and hypernatraemia | 3 (0-4) | 7 | 0.0763 |
| E871 | Hypo-osmolality and hyponatraemia | 2 (0-9) | 2 | 0.9825 |
| E872 | Acidosis | 7 (2-9) | 13 | **0.0064** |
| E873 | Alkalosis | 0 (0-4) | 0 | 0.3533 |
| E875 | Hyperkalaemia | 0 (0-1) | 1 | 0.4271 |
| E876 | Hypokalaemia | 3 (2-4) | 2 | 0.5262 |
| E878 | Other disorders of electrolyte and fluid balance, not elsewhere classified | 1 (0-2) | 0 | 0.2925 |
| E880 | Disorders of plasma-protein metabolism, not elsewhere classified | 1 (0-4) | 0 | 0.2432 |
| E888 | Other specified metabolic disorders | 0 (0-0) | 1 | **0.0253** |
| E889 | Metabolic disorder, unspecified | 0 (0-1) | 1 | 0.4271 |
| **Mental, Behavioural and Neurodevelopmental disorders** | | | | |
| F100/F101 | Mental and behavioural disorders due to use of alcohol | 2 (0-5) | 0 | 0.2019 |
| F120/F121/  F122 | Mental and behavioural disorders due to use of cannabinoids | 0 (0-1) | 1 | 0.4271 |
| F171 | Mental and behavioural disorders due to use of tobacco | 1 (0-3) | 1 | 0.7284 |
| F329 | Depressive episode, unspecified | 4 (3-7) | 5 | 0.9268 |
| F402 | Specific (isolated) phobias | 1 (0-2) | 0 | 0.2925 |
| F408 | Other phobic anxiety disorders | 0 (0-1) | 1 | 0.2003 |
| F419 | Anxiety disorder, unspecified | 9 (1-15) | 11 | 0.3243 |
| F429 | Obsessive-compulsive disorder, unspecified | 0 (0-3) | 3 | **0.0244** |
| F500 | Anorexia nervosa | 2 (1-3) | 2 | 0.7845 |
| F508 | Other eating disorders | 0 (0-0) | 1 | **0.0253** |
| F509 | Eating disorder, unspecified | 1 (0-2) | 3 | 0.0825 |
| F809 | Developmental disorder of speech and language, unspecified | 4 (1-5) | 1 | 0.1463 |
| F819 | Developmental disorder of scholastic skills, unspecified | 6 (4-12) | 7 | 0.9858 |
| F840 | Childhood autism | 14 (7-36) | 14 | 0.7312 |
| F845 | Asperger's syndrome | 2 (0-5) | 0 | 0.1106 |
| F89X | Unspecified disorder of psychological development | 22 (9-37) | 24 | 0.9320 |
| F900 | Disturbance of activity and attention | 4 (3-16) | 7 | 0.6029 |
| F952 | Combined vocal and multiple motor tic disorder [de la Tourette] | 0 (0-1) | 1 | 0.4271 |
| F959 | Tic disorder, unspecified | 0 (0-0) | 2 | **0.0014** |
| F984 | Stereotyped movement disorders | 0 (0-1) | 1 | 0.2003 |
| **Diseases of the nervous system** | | | | |
| G008 | Other bacterial meningitis | 0 (0-4) | 0 | 0.4274 |
| G009 | Bacterial meningitis, unspecified | 0 (0-2) | 5 | 0.0988 |
| G020 | Meningitis in viral diseases classified elsewhere | 5 (1-11) | 0 | **0.0476** |
| G039 | Meningitis, unspecified | 1 (0-6) | 3 | 0.4814 |
| G09X | Sequelae of inflammatory diseases of central nervous system | 1 (0-5) | 1 | 0.5086 |
| G122 | Motor neuron disease | 1 (0-3) | 0 | 0.2931 |
| G129 | Spinal muscular atrophy, unspecified | 0 (0-2) | 2 | **0.0211** |
| G240 | Drug-induced dystonia | 0 (0-0) | 1 | **0.0253** |
| G249 | Dystonia, unspecified | 1 (0-3) | 4 | 0.0635 |
| G253 | Myoclonus | 2 (0-3) | 1 | 0.7105 |
| G255 | Other chorea | 0 (0-1) | 1 | 0.4271 |
| G319 | Degenerative disease of nervous system, unspecified | 1 (0-3) | 0 | 0.2931 |
| G400 | Localization-related (focal)(partial) idiopathic epilepsy and epileptic syndromes with seizures of localized onset | 0 (0-3) | 2 | 0.7411 |
| G401 | Localization-related (focal)(partial) symptomatic epilepsy and epileptic syndromes with simple partial seizures | 2 (1-2) | 2 | 0.8768 |
| G402 | Localization-related (focal)(partial) symptomatic epilepsy and epileptic syndromes with complex partial seizures | 0 (0-1) | 1 | 0.4271 |
| G403 | Generalized idiopathic epilepsy and epileptic syndromes | 5 (2-12) | 6 | 0.5277 |
| G404 | Other generalized epilepsy and epileptic syndromes | 3 (1-10) | 3 | 0.5989 |
| G408 | Other epilepsy | 1 (0-1) | 1 | 0.6423 |
| G409 | Epilepsy, unspecified | 18 (15-27) | 9 | 0.0560 |
| G410 | Grand mal status epilepticus | 0 (0-1) | 1 | 0.2003 |
| G419 | Status epilepticus, unspecified | 2 (1-5) | 5 | 0.4006 |
| G439 | Migraine, unspecified | 4 (1-11) | 3 | 0.5385 |
| G473 | Sleep apnoea | 3 (2-5) | 4 | 0.8147 |
| G479 | Sleep disorder, unspecified | 0 (0-2) | 1 | 0.6423 |
| G510 | Bell's palsy | 2 (0-4) | 2 | 0.6880 |
| G533 | Multiple cranial nerve palsies in neoplastic disease | 0 (0-0) | 1 | **0.0253** |
| G600 | Hereditary motor and sensory neuropathy | 0 (0-0) | 1 | **0.0253** |
| G629 | Polyneuropathy, unspecified | 0 (0-0) | 3 | **0.0001** |
| G713 | Mitochondrial myopathy, not elsewhere classified | 0 (0-0) | 1 | **0.0253** |
| G729 | Myopathy, unspecified | 0 (0-0) | 6 | **0.0001** |
| G800 | Spastic quadriplegic cerebral palsy | 2 (0-3) | 1 | 0.6181 |
| G803 | Dyskinetic cerebral palsy | 1 (0-2) | 0 | 0.2925 |
| G808 | Other cerebral palsy | 3 (1-6) | 2 | 0.3307 |
| G809 | Cerebral palsy, unspecified | 5 (4-7) | 0 | **0.0124** |
| G819 | Hemiplegia, unspecified | 3 (0-5) | 4 | 0.3003 |
| G822 | Paraplegia, unspecified | 1 (0-3) | 0 | 0.2931 |
| G911 | Obstructive hydrocephalus | 2 (0-4) | 4 | 0.1726 |
| G919 | Hydrocephalus, unspecified | 9 (3-11) | 5 | 0.3893 |
| G930 | Cerebral cysts | 3 (0-5) | 2 | 0.5501 |
| G932 | Benign intracranial hypertension | 0 (0-1) | 1 | 0.4271 |
| G934 | Encephalopathy, unspecified | 0 (0-3) | 2 | 0.5960 |
| G936 | Cerebral oedema | 0 (0-1) | 1 | 0.2003 |
| G938 | Other specified disorders of brain | 1 (0-2) | 2 | 0.2424 |
| G941 | Hydrocephalus in neoplastic disease | 1 (0-3) | 1 | 0.8548 |
| G950 | Syringomyelia and syringobulbia | 0 (0-1) | 2 | **0.0172** |
| G951 | Vascular myelopathies | 0 (0-1) | 1 | 0.2003 |
| G958 | Other specified diseases of spinal cord | 0 (0-0) | 2 | **0.0014** |
| G960 | Cerebrospinal fluid leak | 0 (0-1) | 1 | 0.4271 |
| G969 | Disorder of central nervous system, unspecified | 0 (0-0) | 1 | **0.0253** |
| G978 | Other postprocedural disorders of nervous system | 1 (0-3) | 2 | 0.4874 |
| **Diseases of the eye and adnexa** | | | | |
| H000 | Hordeolum and other deep inflammation of eyelid | 0 (0-7) | 1 | 0.6570 |
| H024 | Ptosis of eyelid | 1 (0-3) | 2 | 0.2663 |
| H045 | Stenosis and insufficiency of lacrimal passages | 0 (0-1) | 1 | 0.2003 |
| H050 | Acute inflammation of orbit | 8 (3-9) | 2 | 0.0907 |
| H100 | Mucopurulent conjunctivitis | 0 (0-2) | 1 | 0.6423 |
| H109 | Conjunctivitis, unspecified | 8 (4-10) | 1 | **0.0072** |
| H184 | Corneal degeneration | 0 (0-0) | 1 | **0.0253** |
| H209 | Iridocyclitis, unspecified | 1 (0-3) | 1 | 0.6665 |
| H269 | Cataract, unspecified | 1 (0-1) | 1 | 0.6423 |
| H310 | Chorioretinal scars | 0 (0-0) | 1 | **0.0253** |
| H350 | Background retinopathy and retinal vascular changes | 0 (0-0) | 1 | **0.0253** |
| H351 | Retinopathy of prematurity | 1 (1-5) | 2 | 0.9474 |
| H356 | Retinal haemorrhage | 0 (0-1) | 1 | 0.2003 |
| H400 | Glaucoma suspect | 0 (0-2) | 1 | 0.6423 |
| H471 | Papilloedema, unspecified | 0 (0-4) | 2 | 0.5200 |
| H472 | Optic atrophy | 0 (0-0) | 1 | **0.0253** |
| H492 | Sixth [abducent] nerve palsy | 2 (0-2) | 1 | 0.8347 |
| H498 | Other paralytic strabismus | 0 (0-0) | 1 | **0.0253** |
| H500 | Convergent concomitant strabismus | 2 (1-3) | 1 | 0.4381 |
| H501 | Divergent concomitant strabismus | 0 (0-1) | 1 | 0.2003 |
| H509 | Strabismus, unspecified | 1 (0-4) | 9 | **0.0058** |
| H522 | Astigmatism | 0 (0-4) | 0 | 0.2925 |
| H531 | Subjective visual disturbances | 2 (0-4) | 3 | 0.4025 |
| H532 | Diplopia | 2 (0-4) | 2 | 0.6493 |
| H534 | Visual field defects | 0 (0-0) | 1 | **0.0253** |
| H538 | Other visual disturbances | 3 (0-5) | 1 | 0.3926 |
| H539 | Visual disturbance, unspecified | 0 (0-3) | 1 | 0.6665 |
| H540 | Blindness, binocular | 0 (0-2) | 2 | 0.1406 |
| H544 | Blindness, monocular | 1 (0-1) | 1 | 0.6423 |
| H549 | Unspecified visual impairment (binocular) | 8 (2-9) | 5 | 1.0000 |
| H55X | Nystagmus and other irregular eye movements | 2 (1-3) | 1 | 0.4269 |
| H571 | Ocular pain | 2 (0-2) | 0 | 0.2003 |
| **Diseases of the ear and mastoid process** | | | | |
| H600 | Abscess of external ear | 0 (0-3) | 1 | 0.6423 |
| H609 | Otitis externa, unspecified | 0 (0-1) | 1 | 0.4271 |
| H612 | Impacted cerumen | 0 (0-12) | 0 | 0.2437 |
| H653 | Chronic mucoid otitis media | 1 (0-2) | 2 | 0.2424 |
| H669 | Otitis media, unspecified | 21 (10-32) | 5 | **0.0046** |
| H700 | Acute mastoiditis | 1 (0-2) | 0 | 0.2925 |
| H709 | Mastoiditis, unspecified | 1 (1-1) | 1 | 1.0000 |
| H729 | Perforation of tympanic membrane, unspecified | 2 (0-5) | 0 | 0.1368 |
| H919 | Hearing loss, unspecified | 6 (3-11) | 4 | 0.2870 |
| H920 | Otalgia | 1 (0-2) | 0 | 0.2931 |
| H932 | Other abnormal auditory perceptions | 0 (0-0) | 1 | **0.0253** |
| **Diseases of the circulatory system** | | | | |
| I071 | Tricuspid insufficiency | 0 (0-3) | 1 | 0.6665 |
| I081 | Disorders of both mitral and tricuspid valves | 0 (0-1) | 1 | 0.2003 |
| I10X | Essential (primary) hypertension | 1 (0-3) | 11 | **0.0002** |
| I151 | Hypertension secondary to other renal disorders | 0 (0-0) | 1 | **0.0253** |
| I272 | Other secondary pulmonary hypertension | 1 (0-3) | 2 | 0.3603 |
| I313 | Pericardial effusion (noninflammatory) | 1 (0-2) | 0 | 0.2925 |
| I340 | Mitral (valve) insufficiency | 0 (0-3) | 1 | 0.8333 |
| I425 | Other restrictive cardiomyopathy | 0 (0-0) | 1 | **0.0253** |
| I456 | Pre-excitation syndrome | 0 (0-0) | 3 | **0.0001** |
| I500 | Congestive heart failure | 0 (0-2) | 1 | 0.6423 |
| I501 | Left ventricular failure | 0 (0-0) | 1 | **0.0253** |
| I517 | Cardiomegaly | 1 (0-1) | 1 | 0.8333 |
| I615 | Intracerebral haemorrhage, intraventricular | 0 (0-0) | 2 | **0.0014** |
| I620 | Subdural haemorrhage (acute)(nontraumatic) | 1 (0-4) | 0 | 0.2432 |
| I635 | Cerebral infarction due to unspecified occlusion or stenosis of cerebral arteries | 0 (0-0) | 1 | **0.0253** |
| I694 | Sequelae of stroke, not specified as haemorrhage or infarction | 0 (0-1) | 1 | 0.2003 |
| I801 | Phlebitis and thrombophlebitis of femoral vein | 0 (0-0) | 1 | **0.0253** |
| I802 | Phlebitis and thrombophlebitis of other deep vessels of lower extremities | 0 (0-1) | 1 | 0.2003 |
| I828 | Embolism and thrombosis of other specified veins | 0 (0-1) | 1 | 0.2003 |
| I880 | Nonspecific mesenteric lymphadenitis | 1 (0-3) | 4 | 0.1024 |
| I889 | Nonspecific lymphadenitis, unspecified | 3 (1-6) | 1 | 0.3466 |
| I959 | Hypotension, unspecified | 3 (1-3) | 1 | 0.3466 |
| **Diseases of the respiratory system** | | | | |
| J00X | Acute nasopharyngitis [common cold] | 6 (4-27) | 0 | **0.0075** |
| J019 | Acute sinusitis, unspecified | 1 (0-2) | 0 | 0.2925 |
| J020 | Streptococcal pharyngitis | 0 (0-5) | 1 | 0.6909 |
| J029 | Acute pharyngitis, unspecified | 12 (4-15) | 3 | 0.0582 |
| J039 | Acute tonsillitis, unspecified | 50 (36-58) | 9 | **0.0001** |
| J050 | Acute obstructive laryngitis [croup] | 17 (14-28) | 1 | **0.0002** |
| J069 | Acute upper respiratory infection, unspecified | 62 (54-76) | 24 | **0.0005** |
| J101 | Influenza with other respiratory manifestations, other influenza virus identified | 1 (0-5) | 0 | 0.2012 |
| J108 | Influenza with other manifestations, other influenza virus identified | 1 (0-2) | 0 | 0.2925 |
| J120 | Adenoviral pneumonia | 0 (0-1) | 1 | 0.2003 |
| J129 | Viral pneumonia, unspecified | 0 (0-2) | 1 | 0.8333 |
| J13X | Pneumonia due to Streptococcus pneumoniae | 0 (0-4) | 2 | 0.1580 |
| J181 | Lobar pneumonia, unspecified | 14 (9-25) | 3 | **0.0045** |
| J189 | Pneumonia, unspecified | 10 (2-13) | 6 | 0.5583 |
| J218 | Acute bronchiolitis due to other specified organisms | 1 (0-2) | 1 | 0.8570 |
| J219 | Acute bronchiolitis, unspecified | 36 (18-47) | 7 | **0.0006** |
| J22X | Unspecified acute lower respiratory infection | 54 (44-59) | 22 | **0.0007** |
| J301 | Allergic rhinitis due to pollen | 4 (1-6) | 10 | 0.0828 |
| J310 | Chronic rhinitis | 0 (0-4) | 1 | 0.8548 |
| J328 | Other chronic sinusitis | 0 (0-0) | 1 | **0.0253** |
| J329 | Chronic sinusitis, unspecified | 1 (0-3) | 0 | 0.3533 |
| J348 | Other specified disorders of nose and nasal sinuses | 0 (0-1) | 3 | **0.0156** |
| J351 | Hypertrophy of tonsils | 12 (4-34) | 2 | **0.0102** |
| J36X | Peritonsillar abscess | 2 (0-3) | 0 | 0.1648 |
| J384 | Oedema of larynx | 0 (0-0) | 1 | **0.0253** |
| J390 | Retropharyngeal and parapharyngeal abscess | 0 (0-1) | 1 | 0.4271 |
| J398 | Other specified diseases of upper respiratory tract | 1 (0-1) | 1 | 0.6423 |
| J450 | Predominantly allergic asthma | 1 (0-5) | 6 | 0.0613 |
| J458 | Mixed asthma | 0 (0-0) | 1 | **0.0253** |
| J459 | Asthma, unspecified | 70 (62-79) | 20 | **0.0001** |
| J47X | Bronchiectasis | 0 (0-2) | 1 | 0.2170 |
| J690 | Pneumonitis due to food and vomit | 1 (0-3) | 3 | 0.1348 |
| J81X | Pulmonary oedema | 0 (0-1) | 1 | 0.4271 |
| J869 | Pyothorax without fistula | 0 (0-3) | 1 | 0.8570 |
| J90X | Pleural effusion, not elsewhere classified | 5 (1-10) | 3 | 0.8624 |
| J939 | Pneumothorax, unspecified | 0 (0-5) | 0 | 0.2424 |
| J950 | Tracheostomy malfunction | 0 (0-1) | 1 | 0.2003 |
| J9699 | Respiratory failure, unspecified - Type unspecified | 0 (0-0) | 2 | **0.0014** |
| J981 | Pulmonary collapse | 4 (0-8) | 3 | 0.7925 |
| J984 | Other disorders of lung | 8 (1-8) | 2 | 0.0960 |
| **Diseases of the digestive system** | | | | |
| K029 | Dental caries, unspecified | 2 (0-5) | 0 | 0.1368 |
| K047 | Periapical abscess without sinus | 3 (0-5) | 0 | 0.0701 |
| K053 | Chronic periodontitis | 0 (0-0) | 3 | **0.0014** |
| K070 | Major anomalies of jaw size | 1 (0-2) | 3 | 0.4002 |
| K071 | Anomalies of jaw-cranial base relationship | 0 (0-0) | 1 | **0.0253** |
| K108 | Other specified diseases of jaws | 0 (0-2) | 2 | 0.1406 |
| K112 | Sialoadenitis | 1 (0-3) | 0 | 0.4274 |
| K121 | Other forms of stomatitis | 1 (1-6) | 1 | 0.2869 |
| K122 | Cellulitis and abscess of mouth | 0 (0-1) | 1 | 0.4271 |
| K123 | Oral mucositis (ulcerative) | 1 (0-2) | 2 | 0.3894 |
| K130 | Diseases of lips | 1 (0-5) | 0 | 0.2436 |
| K219 | Gastro-oesophageal reflux disease without oesophagitis | 43 (25-59) | 31 | 0.2083 |
| K296 | Other gastritis | 1 (0-2) | 0 | 0.3533 |
| K297 | Gastritis, unspecified | 1 (1-7) | 2 | 0.9825 |
| K311 | Adult hypertrophic pyloric stenosis | 2 (0-4) | 1 | 0.7105 |
| K353 | Acute appendicitis with localized peritonitis | 8 (1-12) | 2 | 0.1518 |
| K358 | Acute appendicitis, other and unspecified | 8 (5-13) | 3 | 0.0703 |
| K37X | Unspecified appendicitis | 1 (0-5) | 7 | **0.0007** |
| K381 | Appendicular concretions | 1 (0-4) | 0 | 0.2432 |
| K388 | Other specified diseases of appendix | 0 (0-2) | 1 | 0.4271 |
| K403 | Unilateral or unspecified inguinal hernia, with obstruction, without gangrene | 2 (0-4) | 0 | 0.1659 |
| K409 | Unilateral or unspecified inguinal hernia, without obstruction or gangrene | 5 (4-7) | 2 | 0.1067 |
| K429 | Umbilical hernia without obstruction or gangrene | 2 (1-10) | 1 | 0.2869 |
| K449 | Diaphragmatic hernia without obstruction or gangrene | 0 (0-2) | 1 | 0.4271 |
| K509 | Crohn's disease, unspecified | 1 (0-2) | 0 | 0.2424 |
| K519 | Ulcerative colitis, unspecified | 1 (0-4) | 0 | 0.2931 |
| K528 | Other specified noninfective gastroenteritis and colitis | 0 (0-4) | 0 | 0.2931 |
| K561 | Intussusception | 1 (0-4) | 1 | 0.7105 |
| K564 | Other impaction of intestine | 0 (0-3) | 0 | 0.3533 |
| K565 | Intestinal adhesions [bands] with obstruction | 1 (0-1) | 1 | 0.6423 |
| K567 | Ileus, unspecified | 1 (0-1) | 1 | 0.6423 |
| K590 | Constipation | 39 (23-56) | 41 | 0.8384 |
| K598 | Other specified functional intestinal disorders | 0 (0-1) | 2 | 0.0632 |
| K602 | Anal fissure, unspecified | 2 (0-2) | 0 | 0.2432 |
| K610 | Anal abscess | 0 (0-6) | 2 | 0.4194 |
| K625 | Haemorrhage of anus and rectum | 0 (0-1) | 1 | 0.2003 |
| K631 | Perforation of intestine (nontraumatic) | 0 (0-1) | 2 | 0.3847 |
| K650 | Acute peritonitis | 0 (0-1) | 2 | 0.1849 |
| K660 | Peritoneal adhesions | 4 (0-6) | 0 | 0.1130 |
| K768 | Other specified diseases of liver | 0 (0-0) | 1 | **0.0253** |
| K769 | Liver disease, unspecified | 0 (0-0) | 1 | **0.0253** |
| K778 | Liver disorders in other diseases classified elsewhere | 0 (0-0) | 1 | **0.0253** |
| K802 | Calculus of gallbladder without cholecystitis | 0 (0-1) | 1 | 0.4271 |
| K831 | Obstruction of bile duct | 0 (0-1) | 1 | 0.2003 |
| K900 | Coeliac disease | 2 (1-4) | 0 | 0.1368 |
| K904 | Malabsorption due to intolerance, not elsewhere classified | 26 (10-37) | 29 | 0.5511 |
| K912 | Postsurgical malabsorption, not elsewhere classified | 0 (0-5) | 1 | 0.9778 |
| K914 | Colostomy and enterostomy malfunction | 2 (1-3) | 0 | 0.1659 |
| K918 | Other postprocedural disorders of digestive system, not elsewhere classified | 2 (0-6) | 2 | 0.8503 |
| K920 | Haematemesis | 3 (1-5) | 0 | 0.0724 |
| K921 | Melaena | 2 (1-4) | 1 | 0.4952 |
| K922 | Gastrointestinal haemorrhage, unspecified | 2 (0-5) | 1 | 0.4818 |
| **Diseases of the skin and subcutaneous tissue** | | | | |
| L010 | Impetigo [any organism] [any site] | 1 (0-4) | 1 | 0.8347 |
| L021 | Cutaneous abscess, furuncle and carbuncle of neck | 2 (1-3) | 1 | 0.6026 |
| L022 | Cutaneous abscess, furuncle and carbuncle of trunk | 1 (0-2) | 0 | 0.2424 |
| L023 | Cutaneous abscess, furuncle and carbuncle of buttock | 1 (0-1) | 1 | 0.8333 |
| L024 | Cutaneous abscess, furuncle and carbuncle of limb | 2 (1-9) | 2 | 0.5891 |
| L030 | Cellulitis of finger and toe | 6 (3-8) | 1 | 0.0663 |
| L031 | Cellulitis of other parts of limb | 7 (2-11) | 3 | 0.1101 |
| L032 | Cellulitis of face | 2 (0-5) | 1 | 0.4156 |
| L033 | Cellulitis of trunk | 1 (1-5) | 1 | 0.4269 |
| L039 | Cellulitis, unspecified | 0 (0-2) | 1 | 0.6665 |
| L040 | Acute lymphadenitis of face, head and neck | 5 (1-10) | 0 | **0.0291** |
| L059 | Pilonidal cyst without abscess | 0 (0-1) | 2 | **0.0172** |
| L088 | Other specified local infections of skin and subcutaneous tissue | 1 (0-2) | 0 | 0.2424 |
| L089 | Local infection of skin and subcutaneous tissue, unspecified | 5 (3-15) | 3 | 0.6110 |
| L138 | Other specified bullous disorders | 0 (0-0) | 1 | **0.0253** |
| L208 | Other atopic dermatitis | 3 (1-10) | 1 | 0.1657 |
| L209 | Atopic dermatitis, unspecified | 0 (0-1) | 4 | **0.0140** |
| L22X | Diaper [napkin] dermatitis | 6 (3-7) | 5 | 0.5648 |
| L248 | Irritant contact dermatitis due to other agents | 0 (0-0) | 1 | **0.0253** |
| L270 | Generalized skin eruption due to drugs and medicaments | 1 (0-2) | 1 | 0.8333 |
| L272 | Dermatitis due to ingested food | 0 (0-2) | 1 | 0.6423 |
| L280 | Lichen simplex chronicus | 0 (0-0) | 1 | **0.0253** |
| L299 | Pruritus, unspecified | 1 (0-1) | 2 | 0.2424 |
| L303 | Infective dermatitis | 1 (0-2) | 0 | 0.2424 |
| L309 | Dermatitis, unspecified | 40 (20-79) | 33 | 0.3378 |
| L500 | Allergic urticaria | 1 (0-2) | 1 | 1.0000 |
| L509 | Urticaria, unspecified | 2 (0-5) | 1 | 0.4953 |
| L519 | Erythema multiforme, unspecified | 1 (0-5) | 0 | 0.2436 |
| L539 | Erythematous condition, unspecified | 0 (0-6) | 0 | 0.2935 |
| L709 | Acne, unspecified | 0 (0-1) | 2 | **0.0172** |
| L813 | Caf?ó au lait spots | 1 (0-3) | 1 | 0.8570 |
| L858 | Other specified epidermal thickening | 0 (0-0) | 1 | **0.0253** |
| L890 | Stage I decubitus ulcer and pressure area | 0 (0-0) | 1 | **0.0253** |
| L891 | Stage II decubitus ulcer | 0 (0-1) | 1 | 0.2003 |
| L988 | Other specified disorders of skin and subcutaneous tissue | 1 (0-3) | 0 | 0.2003 |
| L989 | Disorder of skin and subcutaneous tissue, unspecified | 1 (0-1) | 1 | 0.6423 |
| **Diseases of the musculoskeletal system and connective tissue** | | | | |
| M009/M0090/  M0091/M0093/  M0995/M0096/  M0097 | Pyogenic arthritis, unspecified | 1 (1-2) | 0 | 0.2424 |
| M029/M0290/  M0921/M0296/  M0297 | Reactive arthropathy, unspecified | 1 (0-2) | 0 | 0.3533 |
| M0800 | Juvenile rheumatoid arthritis | 0 (0-0) | 1 | **0.0253** |
| M088 | Other juvenile arthritis | 0 (0-1) | 1 | 0.2003 |
| M089/M0890 | Juvenile arthritis, unspecified | 0 (0-1) | 1 | 0.2003 |
| M2321/M2326 | Derangement of meniscus due to old tear or injury | 0 (0-0) | 1 | **0.0253** |
| M2381 | Other internal derangements of knee | 0 (0-0) | 1 | **0.0253** |
| M2432/M2435 | Pathological dislocation and subluxation of joint, not elsewhere classified | 0 (0-2) | 1 | 0.4271 |
| M2535 | Other instability of joint | 0 (0-0) | 1 | **0.0253** |
| M2540/M2541/  M2542/M2543/  M2545/M2546/  M2547 | Effusion of joint | 7 (2-12) | 3 | 0.1042 |
| M255/M2550/  M2551/M2552/  M2553/M2555/  M2556/M2557/  M2559 | Pain in joint | 16 (10-20) | 3 | **0.0011** |
| M303 | Mucocutaneous lymph node syndrome [Kawasaki] | 1 (0-2) | 1 | 0.8333 |
| M357 | Hypermobility syndrome | 2 (0-4) | 3 | 0.1783 |
| M405 | Lordosis, unspecified | 0 (0-0) | 1 | **0.0253** |
| M419/M4190/  M4194/M4195/  M4196/M4199 | Scoliosis, unspecified | 3 (2-6) | 6 | 0.3447 |
| M436 | Torticollis | 1 (0-4) | 1 | 0.7105 |
| M512 | Other specified intervertebral disc displacement | 0 (0-0) | 2 | **0.0014** |
| M545/M5455/  M5456/M5457/  M5459 | Low back pain | 3 (0-7) | 1 | 0.1914 |
| M549/M4594/  M5496/M5497/  M5499 | Dorsalgia, unspecified | 3 (1-4) | 0 | 0.1115 |
| M609/M6090/  M6094/M6095/  M6096 | Myositis, unspecified | 1 (1-3) | 0 | 0.1648 |
| M628/M6280/  M6289 | Other specified disorders of muscle | 2 (0-6) | 2 | 0.7845 |
| M658/M6585 | Other synovitis and tenosynovitis | 2 (0-4) | 0 | 0.2023 |
| M659/M6592/  M6593/M6595/  M6596/M6597 | Synovitis and tenosynovitis, unspecified | 2 (1-3) | 1 | 0.6749 |
| M673 | Transient synovitis | 10 (3-14) | 1 | **0.0146** |
| M791/M7910/  M7916/M7919 | Myalgia | 1 (0-2) | 2 | 0.9116 |
| M7927 | Neuralgia and neuritis, unspecified | 0 (0-0) | 2 | **0.0014** |
| M796/M7960/  M7962/M7963/  M7964/M7965/  M7966/M7967/  M7969 | Pain in limb | 7 (6-11) | 1 | **0.0032** |
| M798/M7980/  M7982/M7983/  M7984/M7985/  M7986/M7987/  M7989 | Other specified soft tissue disorders | 4 (1-6) | 0 | **0.0450** |
| M8612/M8615/  M8616/M8617 | Other acute osteomyelitis | 1 (0-6) | 0 | 0.2935 |
| M869/M8690/  M8691/M8692/  M8694/M8695/  M8696/M8697/  M8699/M8795/  M8796 | Osteomyelitis, unspecified | 3 (1-7) | 3 | 0.7631 |
| **Diseases of the genitourinary system** | | | | |
| N10X | Acute tubulo-interstitial nephritis | 2 (0-2) | 3 | 0.2003 |
| N110 | Nonobstructive reflux-associated chronic pyelonephritis | 0 (0-0) | 1 | **0.0253** |
| N12X | Tubulo-interstitial nephritis, not specified as acute or chronic | 2 (1-7) | 5 | 0.3231 |
| N133 | Other and unspecified hydronephrosis | 1 (0-3) | 0 | 0.2003 |
| N135 | Kinking and stricture of ureter without hydronephrosis | 0 (0-0) | 1 | **0.0253** |
| N137 | Vesicoureteral-reflux-associated uropathy | 2 (0-3) | 2 | 0.7845 |
| N151 | Renal and perinephric abscess | 0 (0-0) | 3 | **0.0001** |
| N170 | Acute renal failure with tubular necrosis | 0 (0-0) | 1 | **0.0253** |
| N179 | Acute renal failure, unspecified | 1 (1-3) | 8 | **0.0172** |
| N185 | Chronic kidney disease, stage 5 | 1 (0-3) | 0 | 0.2934 |
| N189 | Chronic kidney disease, unspecified | 1 (0-4) | 0 | 0.2432 |
| N200 | Calculus of kidney | 1 (0-1) | 1 | 0.6423 |
| N281 | Cyst of kidney, acquired | 0 (0-1) | 1 | 0.4271 |
| N288 | Other specified disorders of kidney and ureter | 2 (0-3) | 4 | **0.0408** |
| N319 | Neuromuscular dysfunction of bladder, unspecified | 4 (2-10) | 0 | **0.0166** |
| N328 | Other specified disorders of bladder | 0 (0-1) | 2 | 0.0632 |
| N390 | Urinary tract infection, site not specified | 33 (27-54) | 25 | 0.1783 |
| N433 | Hydrocele, unspecified | 1 (0-4) | 2 | 0.3894 |
| N44X | Torsion of testis | 4 (1-8) | 7 | 0.1748 |
| N459 | Orchitis, epididymitis and epididymo-orchitis without abscess | 2 (0-4) | 0 | 0.1659 |
| N47X | Redundant prepuce, phimosis and paraphimosis | 1 (0-3) | 0 | 0.2931 |
| N481 | Balanoposthitis | 1 (0-3) | 1 | 0.9778 |
| N488 | Other specified disorders of penis | 1 (0-3) | 1 | 1.0000 |
| N508 | Other specified disorders of male genital organs | 2 (0-4) | 6 | **0.0464** |
| N509 | Disorder of male genital organs, unspecified | 0 (0-0) | 2 | **0.0014** |
| N771 | Vaginitis, vulvitis and vulvovaginitis in infectious and parasitic diseases classified elsewhere | 0 (0-1) | 1 | 0.4271 |
| N832 | Other and unspecified ovarian cysts | 1 (0-5) | 0 | 0.1659 |
| N838 | Other noninflammatory disorders of ovary, fallopian tube and broad ligament | 0 (0-1) | 1 | 0.4271 |
| N920 | Excessive and frequent menstruation with regular cycle | 1 (0-1) | 1 | 0.6423 |
| N939 | Abnormal uterine and vaginal bleeding, unspecified | 1 (0-1) | 1 | 0.6423 |
| **Certain conditions originating in the perinatal period** | | | | |
| P059 | Slow fetal growth, unspecified | 1 (0-1) | 1 | 0.6423 |
| P070 | Extremely low birth weight | 2 (0-9) | 1 | 0.5400 |
| P071 | Other low birth weight | 4 (0-7) | 2 | 0.4251 |
| P072 | Extreme immaturity | 3 (0-7) | 2 | 0.7245 |
| P073 | Other preterm infants | 3 (0-8) | 3 | 0.9154 |
| P153 | Birth injury to eye | 0 (0-0) | 1 | **0.0253** |
| P220 | Respiratory distress syndrome of newborn | 4 (0-8) | 2 | 0.4573 |
| P221 | Transient tachypnoea of newborn | 1 (0-3) | 2 | 0.8625 |
| P229 | Respiratory distress of newborn, unspecified | 2 (1-3) | 0 | 0.1094 |
| P251 | Pneumothorax originating in the perinatal period | 1 (0-2) | 1 | 1.0000 |
| P271 | Bronchopulmonary dysplasia originating in the perinatal period | 1 (0-4) | 4 | 0.0549 |
| P279 | Unspecified chronic respiratory disease originating in the perinatal period | 0 (0-1) | 1 | 0.4271 |
| P284 | Other apnoea of newborn | 2 (0-6) | 4 | 0.5013 |
| P288 | Other specified respiratory conditions of newborn | 3 (2-9) | 5 | 0.8526 |
| P291 | Neonatal cardiac dysrhythmia | 1 (1-5) | 1 | 0.5220 |
| P293 | Persistent fetal circulation | 1 (0-3) | 0 | 0.2432 |
| P298 | Other cardiovascular disorders originating in the perinatal period | 2 (0-7) | 1 | 0.4156 |
| P369 | Bacterial sepsis of newborn, unspecified | 6 (2-9) | 5 | 0.8140 |
| P375 | Neonatal candidiasis | 0 (0-2) | 2 | 0.1406 |
| P38X | Omphalitis of newborn with or without mild haemorrhage | 1 (0-2) | 2 | 0.4874 |
| P391 | Neonatal conjunctivitis and dacryocystitis | 3 (0-3) | 0 | 0.2022 |
| P393 | Neonatal urinary tract infection | 3 (1-12) | 6 | 0.4824 |
| P394 | Neonatal skin infection | 1 (0-2) | 1 | 1.0000 |
| P398 | Other specified infections specific to the perinatal period | 3 (0-12) | 1 | 0.2164 |
| P521 | Intraventricular (nontraumatic) haemorrhage, grade 2, of fetus and newborn | 0 (0-1) | 1 | 0.2003 |
| P543 | Other neonatal gastrointestinal haemorrhage | 0 (0-1) | 1 | 0.4271 |
| P545 | Neonatal cutaneous haemorrhage | 1 (0-2) | 1 | 1.0000 |
| P548 | Other specified neonatal haemorrhages | 0 (0-2) | 1 | 0.4271 |
| P551 | ABO isoimmunization of fetus and newborn | 0 (0-0) | 1 | **0.0253** |
| P579 | Kernicterus, unspecified | 0 (0-0) | 1 | **0.0253** |
| P590 | Neonatal jaundice associated with preterm delivery | 5 (1-7) | 3 | 0.8774 |
| P593 | Neonatal jaundice from breast milk inhibitor | 0 (0-0) | 1 | **0.0253** |
| P610 | Transient neonatal thrombocytopenia | 1 (0-4) | 1 | 0.7105 |
| P612 | Anaemia of prematurity | 3 (0-5) | 1 | 0.4042 |
| P618 | Other specified perinatal haematological disorders | 0 (0-0) | 1 | **0.0253** |
| P700 | Syndrome of infant of mother with gestational diabetes | 0 (0-0) | 1 | **0.0253** |
| P704 | Other neonatal hypoglycaemia | 2 (1-3) | 2 | 0.7235 |
| P712 | Neonatal hypomagnesaemia | 1 (0-3) | 0 | 0.2925 |
| P740 | Late metabolic acidosis of newborn | 1 (0-2) | 0 | 0.2925 |
| P741 | Dehydration of newborn | 0 (0-1) | 1 | 0.2003 |
| P742 | Disturbances of sodium balance of newborn | 3 (0-4) | 0 | 0.0714 |
| P743 | Disturbances of potassium balance of newborn | 0 (0-4) | 0 | 0.3533 |
| P748 | Other transitory metabolic disturbances of newborn | 1 (0-4) | 2 | 0.6529 |
| P760 | Meconium plug syndrome | 0 (0-2) | 1 | 0.6423 |
| P788 | Other specified perinatal digestive system disorders | 7 (4-9) | 7 | 0.9712 |
| P789 | Perinatal digestive system disorder, unspecified | 1 (0-3) | 0 | 0.2432 |
| P809 | Hypothermia of newborn, unspecified | 1 (0-2) | 1 | 1.0000 |
| P819 | Disturbance of temperature regulation of newborn, unspecified | 1 (0-4) | 3 | 0.3762 |
| P831 | Neonatal erythema toxicum | 0 (0-1) | 1 | 0.2003 |
| P835 | Congenital hydrocele | 2 (1-3) | 1 | 0.5870 |
| P838 | Other specified conditions of integument specific to fetus and newborn | 1 (0-3) | 2 | 0.3603 |
| P90X | Convulsions of newborn | 1 (0-2) | 0 | 0.2424 |
| P916 | Hypoxic ischaemic encephalopathy of newborn | 3 (1-8) | 2 | 0.4454 |
| P917 | Acquired hydrocephalus of newborn | 0 (0-1) | 1 | 1.0000 |
| P920 | Vomiting in newborn | 5 (3-7) | 8 | 0.3066 |
| P922 | Slow feeding of newborn | 0 (0-0) | 1 | **0.0253** |
| P923 | Underfeeding of newborn | 0 (0-6) | 0 | 0.2436 |
| P924 | Overfeeding of newborn | 1 (0-1) | 3 | 0.1183 |
| P928 | Other feeding problems of newborn | 6 (2-9) | 5 | 0.9275 |
| P929 | Feeding problem of newborn, unspecified | 2 (0-6) | 4 | 0.8813 |
| P942 | Congenital hypotonia | 2 (1-4) | 0 | 0.1368 |
| P968 | Other specified conditions originating in the perinatal period | 2 (0-5) | 4 | 0.6136 |
| P969 | Condition originating in the perinatal period, unspecified | 0 (0-0) | 1 | **0.0253** |
| **Congenital malformations, deformations and chromosomal abnormalities** | | | | |
| Q02X | Microcephaly | 4 (3-10) | 3 | 0.5023 |
| Q031 | Atresia of foramina of Magendie and Luschka | 0 (0-5) | 0 | 0.3533 |
| Q039 | Congenital hydrocephalus, unspecified | 1 (0-2) | 1 | 0.9778 |
| Q040 | Congenital malformations of corpus callosum | 1 (0-2) | 1 | 1.0000 |
| Q043 | Other reduction deformities of brain | 0 (0-3) | 1 | 0.8333 |
| Q048 | Other specified congenital malformations of brain | 1 (0-2) | 3 | **0.0442** |
| Q050 | Cervical spina bifida with hydrocephalus | 0 (0-0) | 2 | **0.0014** |
| Q054 | Unspecified spina bifida with hydrocephalus | 0 (0-7) | 0 | 0.1659 |
| Q070 | Arnold-Chiari syndrome | 2 (2-4) | 1 | 0.2945 |
| Q172 | Microtia | 0 (0-1) | 1 | 0.2003 |
| Q179 | Congenital malformation of ear, unspecified | 0 (0-1) | 2 | 0.1849 |
| Q189 | Congenital malformation of face and neck, unspecified | 0 (0-1) | 1 | 0.2003 |
| Q210 | Ventricular septal defect | 8 (1-10) | 7 | 0.9569 |
| Q211 | Atrial septal defect | 8 (3-10) | 7 | 0.8711 |
| Q212 | Atrioventricular septal defect | 1 (0-2) | 0 | 0.2925 |
| Q213 | Tetralogy of Fallot | 1 (0-1) | 1 | 0.6423 |
| Q248 | Other specified congenital malformations of heart | 0 (0-1) | 4 | **0.0001** |
| Q250 | Patent ductus arteriosus | 2 (1-8) | 5 | 0.4304 |
| Q256 | Stenosis of pulmonary artery | 2 (0-3) | 2 | 0.8434 |
| Q278 | Other specified congenital malformations of peripheral vascular system | 0 (0-1) | 2 | 0.1849 |
| Q283 | Other malformations of cerebral vessels | 0 (0-1) | 1 | 0.2003 |
| Q300 | Choanal atresia | 0 (0-1) | 1 | 0.2003 |
| Q315 | Congenital laryngomalacia | 4 (4-16) | 3 | 0.1592 |
| Q353 | Cleft soft palate | 0 (0-0) | 2 | **0.0253** |
| Q359 | Cleft palate, unspecified | 0 (0-2) | 3 | 0.1183 |
| Q381 | Ankyloglossia | 2 (1-5) | 3 | 0.8265 |
| Q391 | Atresia of oesophagus with tracheo-oesophageal fistula | 1 (0-2) | 0 | 0.3533 |
| Q400 | Congenital hypertrophic pyloric stenosis | 3 (1-5) | 1 | 0.2293 |
| Q431 | Hirschsprung's disease | 2 (0-5) | 2 | 0.9825 |
| Q433 | Congenital malformations of intestinal fixation | 1 (0-2) | 0 | 0.3535 |
| Q438 | Other specified congenital malformations of intestine | 2 (0-3) | 1 | 0.7105 |
| Q442 | Atresia of bile ducts | 1 (0-3) | 0 | 0.2925 |
| Q500 | Congenital absence of ovary | 0 (0-0) | 3 | **0.0001** |
| Q503 | Other congenital malformations of ovary | 0 (0-0) | 1 | **0.0253** |
| Q531 | Undescended testicle, unilateral | 1 (0-3) | 4 | 0.0635 |
| Q532 | Undescended testicle, bilateral | 0 (0-1) | 3 | **0.0011** |
| Q540 | Hypospadias, balanic | 0 (0-0) | 2 | **0.0014** |
| Q541 | Hypospadias, penile | 0 (0-0) | 1 | **0.0253** |
| Q549 | Hypospadias, unspecified | 1 (0-4) | 1 | 0.8347 |
| Q552 | Other congenital malformations of testis and scrotum | 2 (0-7) | 3 | 0.8741 |
| Q554 | Other congenital malformations of vas deferens, epididymis, seminal vesicles and prostate | 0 (0-1) | 1 | 0.4271 |
| Q614 | Renal dysplasia | 1 (0-3) | 1 | 1.0000 |
| Q620 | Congenital hydronephrosis | 1 (0-2) | 5 | **0.0328** |
| Q622 | Congenital megaloureter | 0 (0-1) | 1 | 0.2003 |
| Q630 | Accessory kidney | 2 (1-6) | 2 | 0.5253 |
| Q631 | Lobulated, fused and horseshoe kidney | 1 (0-3) | 0 | 0.2424 |
| Q652 | Congenital dislocation of hip, unspecified | 0 (0-4) | 0 | 0.2931 |
| Q658 | Other congenital deformities of hip | 1 (0-4) | 0 | 0.2012 |
| Q659 | Congenital deformity of hip, unspecified | 0 (0-0) | 1 | **0.0253** |
| Q668 | Other congenital deformities of feet | 1 (0-4) | 0 | 0.1648 |
| Q673 | Plagiocephaly | 0 (0-2) | 4 | 0.0987 |
| Q674 | Other congenital deformities of skull, face and jaw | 0 (0-1) | 1 | 0.2003 |
| Q741 | Congenital malformation of knee | 0 (0-1) | 1 | 0.2003 |
| Q750 | Craniosynostosis | 1 (0-2) | 2 | 0.2915 |
| Q751 | Craniofacial dysostosis | 1 (0-2) | 3 | 0.2012 |
| Q753 | Macrocephaly | 1 (0-3) | 1 | 0.8548 |
| Q754 | Mandibulofacial dysostosis | 0 (0-1) | 1 | 0.2003 |
| Q812 | Epidermolysis bullosa dystrophica | 0 (0-0) | 1 | **0.0253** |
| Q851 | Tuberous sclerosis | 0 (0-1) | 1 | 0.2003 |
| Q870 | Congenital malformation syndromes predominantly affecting facial appearance | 1 (0-3) | 1 | 0.8570 |
| Q871 | Congenital malformation syndromes predominantly associated with short stature | 1 (0-6) | 1 | 0.4952 |
| Q873 | Congenital malformation syndromes involving early overgrowth | 0 (0-1) | 1 | 0.2003 |
| Q878 | Other specified congenital malformation syndromes, not elsewhere classified | 1 (0-1) | 2 | 0.5731 |
| Q909 | Down's syndrome, unspecified | 7 (3-10) | 2 | **0.0405** |
| Q926 | Extra marker chromosomes | 0 (0-0) | 1 | **0.0253** |
| Q928 | Other specified trisomies and partial trisomies of autosomes | 1 (0-3) | 0 | 0.2925 |
| Q935 | Other deletions of part of a chromosome | 3 (1-5) | 1 | 0.3372 |
| Q938 | Other deletions from the autosomes | 3 (0-4) | 1 | 0.4156 |
| Q998 | Other specified chromosome abnormalities | 1 (0-7) | 0 | 0.2935 |
| Q999 | Chromosomal abnormality, unspecified | 0 (0-2) | 2 | 0.2424 |
| **Symptoms, signs and abnormal clinical and laboratory findings, not elsewhere classified** | | | | |
| R000 | Tachycardia, unspecified | 9 (6-36) | 24 | 0.0664 |
| R001 | Bradycardia, unspecified | 3 (1-5) | 8 | **0.0063** |
| R002 | Palpitations | 1 (1-2) | 2 | 0.6181 |
| R010 | Benign and innocent cardiac murmurs | 1 (0-3) | 0 | 0.2931 |
| R011 | Cardiac murmur, unspecified | 8 (1-13) | 19 | **0.0280** |
| R02X | Gangrene, not elsewhere classified | 0 (0-6) | 0 | 0.1659 |
| R030 | Elevated blood-pressure reading, without diagnosis of hypertension | 1 (0-2) | 0 | 0.2925 |
| R031 | Nonspecific low blood-pressure reading | 0 (0-1) | 1 | 0.4271 |
| R040 | Epistaxis | 5 (3-9) | 3 | 0.5156 |
| R042 | Haemoptysis | 0 (0-1) | 2 | **0.0172** |
| R05X | Cough | 16 (9-23) | 12 | 0.4204 |
| R060 | Dyspnoea | 7 (4-8) | 2 | 0.1032 |
| R061 | Stridor | 3 (1-5) | 1 | 0.4043 |
| R062 | Wheezing | 105 (81-132) | 20 | **0.0001** |
| R064 | Hyperventilation | 0 (0-1) | 1 | 0.2003 |
| R065 | Mouth breathing | 2 (0-3) | 0 | 0.1659 |
| R068 | Other and unspecified abnormalities of breathing | 10 (5-22) | 12 | 0.8764 |
| R074 | Chest pain, unspecified | 4 (3-7) | 3 | 0.4936 |
| R090 | Asphyxia | 0 (0-1) | 2 | 0.0632 |
| R092 | Respiratory arrest | 1 (0-2) | 1 | 0.8333 |
| R098 | Other specified symptoms and signs involving the circulatory and respiratory systems | 1 (0-5) | 4 | 0.1190 |
| R101 | Pain localized to upper abdomen | 3 (2-7) | 0 | **0.0356** |
| R103 | Pain localized to other parts of lower abdomen | 15 (9-25) | 9 | 0.1539 |
| R104 | Other and unspecified abdominal pain | 35 (25-51) | 7 | **0.0003** |
| R11X | Nausea and vomiting | 91 (69-129) | 37 | **0.0003** |
| R13X | Dysphagia | 7 (3-13) | 2 | 0.0692 |
| R14X | Flatulence and related conditions | 3 (1-7) | 2 | 0.6265 |
| R15X | Faecal incontinence | 1 (0-2) | 0 | 0.2925 |
| R160 | Hepatomegaly, not elsewhere classified | 2 (0-3) | 1 | 0.7284 |
| R17X | Unspecified jaundice | 3 (1-5) | 1 | 0.4952 |
| R18X | Ascites | 2 (1-7) | 1 | 0.4819 |
| R190 | Intra-abdominal and pelvic swelling, mass and lump | 2 (0-2) | 2 | 0.8434 |
| R195 | Other faecal abnormalities | 3 (0-4) | 0 | 0.0714 |
| R202 | Paraesthesia of skin | 1 (0-6) | 1 | 0.6026 |
| R208 | Other and unspecified disturbances of skin sensation | 1 (0-2) | 0 | 0.2925 |
| R21X | Rash and other nonspecific skin eruption | 36 (31-51) | 13 | **0.0006** |
| R220 | Localized swelling, mass and lump, head | 3 (1-10) | 1 | 0.1168 |
| R222 | Localized swelling, mass and lump, trunk | 2 (1-4) | 0 | 0.1094 |
| R230 | Cyanosis | 3 (0-6) | 2 | 0.9474 |
| R231 | Pallor | 1 (0-3) | 1 | 0.8570 |
| R232 | Flushing | 0 (0-1) | 1 | 0.2003 |
| R233 | Spontaneous ecchymoses | 32 (22-36) | 2 | **0.0001** |
| R238 | Other and unspecified skin changes | 1 (0-4) | 1 | 0.7105 |
| R250 | Abnormal head movements | 0 (0-2) | 1 | 0.6423 |
| R253 | Fasciculation | 1 (0-1) | 1 | 0.6423 |
| R258 | Other and unspecified abnormal involuntary movements | 5 (0-7) | 2 | 0.6267 |
| R260 | Ataxic gait | 0 (0-1) | 3 | **0.0156** |
| R262 | Difficulty in walking, not elsewhere classified | 7 (0-17) | 2 | 0.0753 |
| R268 | Other and unspecified abnormalities of gait and mobility | 14 (6-30) | 9 | 0.2139 |
| R270 | Ataxia, unspecified | 0 (0-1) | 2 | **0.0172** |
| R278 | Other and unspecified lack of coordination | 1 (0-4) | 1 | 0.8807 |
| R294 | Clicking hip | 1 (0-2) | 3 | 0.2012 |
| R298 | Other and unspecified symptoms and signs involving the nervous and musculoskeletal systems | 4 (1-6) | 5 | 0.2571 |
| R300 | Dysuria | 2 (0-3) | 0 | 0.1648 |
| R31X | Unspecified haematuria | 7 (3-8) | 3 | 0.3506 |
| R32X | Unspecified urinary incontinence | 2 (1-4) | 2 | 0.8503 |
| R33X | Retention of urine | 4 (3-9) | 0 | **0.0224** |
| R400 | Somnolence | 2 (1-12) | 6 | 0.2910 |
| R402 | Coma, unspecified | 0 (0-4) | 0 | 0.4274 |
| R410 | Disorientation, unspecified | 2 (0-4) | 2 | 0.8768 |
| R412 | Retrograde amnesia | 1 (0-2) | 0 | 0.3533 |
| R413 | Other amnesia | 1 (0-1) | 1 | 0.6423 |
| R418 | Other and unspecified symptoms and signs involving cognitive functions and awareness | 2 (0-3) | 2 | 0.6529 |
| R42X | Dizziness and giddiness | 4 (2-8) | 1 | 0.1378 |
| R451 | Restlessness and agitation | 0 (0-2) | 1 | 0.4271 |
| R454 | Irritability and anger | 1 (0-3) | 0 | 0.2432 |
| R458 | Other symptoms and signs involving emotional state | 10 (4-16) | 7 | 0.7260 |
| R468 | Other symptoms and signs involving appearance and behaviour | 1 (0-3) | 0 | 0.2432 |
| R470 | Dysphasia and aphasia | 1 (0-1) | 1 | 0.6423 |
| R478 | Other and unspecified speech disturbances | 1 (0-1) | 1 | 0.6423 |
| R480 | Dyslexia and alexia | 2 (0-2) | 1 | 0.8548 |
| R508 | Other specified fever | 2 (0-2) | 0 | 0.2931 |
| R509 | Fever, unspecified | 93 (71-114) | 61 | **0.0313** |
| R51X | Headache | 27 (24-30) | 8 | **0.0009** |
| R522 | Other chronic pain | 0 (0-1) | 1 | 0.4271 |
| R53X | Malaise and fatigue | 17 (10-19) | 6 | **0.0334** |
| R55X | Syncope and collapse | 8 (6-11) | 3 | 0.0720 |
| R560 | Febrile convulsions | 18 (12-21) | 10 | 0.0690 |
| R568 | Other and unspecified convulsions | 20 (14-40) | 10 | **0.0254** |
| R572 | Septic shock | 0 (0-3) | 1 | 0.8570 |
| R590 | Localized enlarged lymph nodes | 8 (4-14) | 7 | 0.5858 |
| R591 | Generalized enlarged lymph nodes | 2 (0-2) | 2 | 0.6181 |
| R609 | Oedema, unspecified | 0 (0-1) | 1 | 0.4271 |
| R620 | Delayed milestone | 0 (0-2) | 2 | 0.0632 |
| R628 | Other lack of expected normal physiological development | 11 (6-20) | 11 | 0.2637 |
| R629 | Lack of expected normal physiological development, unspecified | 9 (4-19) | 13 | 0.2261 |
| R630 | Anorexia | 10 (1-30) | 1 | **0.0048** |
| R631 | Polydipsia | 0 (0-1) | 1 | 0.2003 |
| R633 | Feeding difficulties and mismanagement | 14 (12-51) | 11 | 0.1182 |
| R634 | Abnormal weight loss | 7 (4-13) | 3 | 0.1118 |
| R638 | Other symptoms and signs concerning food and fluid intake | 3 (0-14) | 0 | **0.0293** |
| R681 | Nonspecific symptoms peculiar to infancy | 7 (4-14) | 8 | 0.9858 |
| R72X | Abnormality of white blood cells, not elsewhere classified | 0 (0-1) | 1 | 0.2003 |
| R739 | Hyperglycaemia, unspecified | 0 (0-1) | 2 | **0.0172** |
| R798 | Other specified abnormal findings of blood chemistry | 5 (0-9) | 2 | 0.9825 |
| R80X | Isolated proteinuria | 2 (0-4) | 1 | 0.5086 |
| R81X | Glycosuria | 0 (0-0) | 2 | **0.0014** |
| R827 | Abnormal findings on microbiological examination of urine | 2 (0-6) | 0 | 0.0915 |
| R829 | Other and unspecified abnormal findings in urine | 1 (0-2) | 1 | 0.8333 |
| R835 | Abnormal findings in cerebrospinal fluid | 0 (0-3) | 0 | 0.3533 |
| R844/R845 | Abnormal findings in specimens from respiratory organs and thorax | 4 (0-11) | 3 | 0.6121 |
| R854/R855/  R858 | Abnormal findings in specimens from digestive organs and abdominal cavity | 0 (0-4) | 0 | 0.2432 |
| R895/R894 | Abnormal findings in specimens from other organs, systems and tissues | 1 (0-8) | 0 | 0.1670 |
| R91X | Abnormal findings on diagnostic imaging of lung | 0 (0-1) | 1 | 0.2003 |
| R932 | Abnormal findings on diagnostic imaging of liver and biliary tract | 0 (0-0) | 1 | **0.0253** |
| R938 | Abnormal findings on diagnostic imaging of other specified body structures | 0 (0-1) | 1 | 0.2003 |
| R943 | Abnormal results of cardiovascular function studies | 0 (0-0) | 3 | **0.0014** |
| R945 | Abnormal results of liver function studies | 2 (1-4) | 2 | 0.9658 |
| **Injury, poisoning and certain other consequences of external causes** | | | | |
| S000 | Superficial injury of scalp | 2 (1-4) | 3 | 0.9332 |
| S001 | Contusion of eyelid and periocular area | 2 (0-3) | 0 | 0.2012 |
| S002 | Other superficial injuries of eyelid and periocular area | 1 (0-3) | 0 | 0.3533 |
| S003 | Superficial injury of nose | 1 (0-2) | 1 | 1.0000 |
| S005 | Superficial injury of lip and oral cavity | 1 (0-1) | 2 | 0.2424 |
| S008 | Superficial injury of other parts of head | 9 (7-20) | 4 | **0.0390** |
| S009 | Superficial injury of head, part unspecified | 5 (2-10) | 0 | **0.0376** |
| S010 | Open wound of scalp | 2 (1-3) | 1 | 0.4381 |
| S011 | Open wound of eyelid and periocular area | 1 (0-2) | 1 | 1.0000 |
| S012 | Open wound of nose | 1 (0-2) | 1 | 0.8333 |
| S013 | Open wound of ear | 2 (1-4) | 1 | 0.4269 |
| S014 | Open wound of cheek and temporomandibular area | 2 (0-4) | 1 | 0.5086 |
| S015 | Open wound of lip and oral cavity | 8 (5-15) | 6 | 0.1587 |
| S017 | Multiple open wounds of head | 1 (0-3) | 0 | 0.2925 |
| S018 | Open wound of other parts of head | 8 (5-14) | 2 | **0.0324** |
| S020/S0200/  S0201 | Fracture of vault of skull | 3 (0-4) | 1 | 0.3560 |
| S021/S210/  S0211 | Fracture of base of skull | 3 (1-4) | 1 | 0.4156 |
| S0250/S025 | Fracture of tooth | 1 (0-1) | 1 | 0.8333 |
| S032 | Dislocation of tooth | 0 (0-2) | 1 | 0.6423 |
| S058 | Other injuries of eye and orbit | 0 (0-0) | 1 | **0.0253** |
| S0620/S0621 | Diffuse brain injury | 1 (0-2) | 0 | 0.2931 |
| S064/S0640 | Epidural haemorrhage | 1 (0-2) | 1 | 1.0000 |
| S0661/S0660 | Traumatic subarachnoid haemorrhage | 2 (0-2) | 0 | 0.2003 |
| S068/S0680 | Other intracranial injuries | 1 (0-3) | 0 | 0.3533 |
| S098 | Other specified injuries of head | 0 (0-2) | 2 | 0.1406 |
| S099 | Unspecified injury of head | 11 (7-25) | 2 | **0.0069** |
| S108 | Superficial injury of other parts of neck | 1 (0-2) | 0 | 0.3533 |
| S118 | Open wound of other parts of neck | 0 (0-1) | 1 | 0.2003 |
| S2200 | Fracture of thoracic vertebra | 1 (0-3) | 0 | 0.2925 |
| S273/S2730/  S2731 | Other injuries of lung | 2 (2-3) | 0 | 0.1670 |
| S307 | Multiple superficial injuries of abdomen, lower back and pelvis | 0 (0-1) | 1 | 0.2003 |
| S308 | Other superficial injuries of abdomen, lower back and pelvis | 0 (0-6) | 0 | 0.2432 |
| S309 | Superficial injury of abdomen, lower back and pelvis, part unspecified | 1 (1-2) | 0 | 0.2003 |
| S310 | Open wound of lower back and pelvis | 1 (0-1) | 1 | 0.6423 |
| S314 | Open wound of vagina and vulva | 0 (0-1) | 1 | 0.4271 |
| S399 | Unspecified injury of abdomen, lower back and pelvis | 0 (0-5) | 0 | 0.5221 |
| S407 | Multiple superficial injuries of shoulder and upper arm | 0 (0-0) | 1 | **0.0253** |
| S411 | Open wound of upper arm | 0 (0-4) | 1 | 0.6665 |
| S417 | Multiple open wounds of shoulder and upper arm | 0 (0-0) | 1 | **0.0253** |
| S4200 | Fracture of clavicle | 1 (0-3) | 0 | 0.2432 |
| S424/S4240/  S4241 | Fracture of lower end of humerus | 10 (4-14) | 3 | **0.0203** |
| S507 | Multiple superficial injuries of forearm | 0 (0-1) | 2 | **0.0172** |
| S509 | Superficial injury of forearm, unspecified | 0 (0-4) | 0 | 0.3533 |
| S518 | Open wound of other parts of forearm | 0 (0-1) | 2 | 0.3847 |
| S519 | Open wound of forearm, part unspecified | 2 (0-3) | 0 | 0.1648 |
| S5200/S5201 | Fracture of upper end of ulna | 1 (0-4) | 2 | 0.6181 |
| S5210 | Fracture of upper end of radius | 1 (0-2) | 3 | 0.2438 |
| S5220 | Fracture of shaft of ulna | 0 (0-4) | 0 | 0.2925 |
| S5230 | Fracture of shaft of radius | 1 (0-1) | 1 | 0.6423 |
| S5240/M5241 | Fracture of shafts of both ulna and radius | 3 (2-11) | 1 | 0.0737 |
| S5250/S5251 | Fracture of lower end of radius | 5 (5-10) | 2 | 0.0543 |
| S5260/S5261 | Fracture of lower end of both ulna and radius | 7 (5-10) | 4 | 0.2401 |
| S527/S5270/  S5271 | Multiple fractures of forearm | 2 (0-3) | 0 | 0.1648 |
| S530 | Dislocation of radial head | 0 (0-0) | 1 | **0.0253** |
| S534 | Sprain and strain of elbow | 0 (0-0) | 1 | **0.0253** |
| S609 | Superficial injury of wrist and hand, unspecified | 0 (0-4) | 0 | 0.2925 |
| S610 | Open wound of finger(s) without damage to nail | 6 (3-6) | 1 | 0.1027 |
| S611 | Open wound of finger(s) with damage to nail | 8 (3-11) | 1 | **0.0099** |
| S618 | Open wound of other parts of wrist and hand | 2 (0-4) | 1 | 0.5086 |
| S619 | Open wound of wrist and hand part, part unspecified | 1 (0-3) | 0 | 0.2925 |
| S6250/S6251 | Fracture of thumb | 1 (0-3) | 0 | 0.2424 |
| S6260/S6261 | Fracture of other finger | 8 (4-12) | 1 | **0.0064** |
| S681 | Traumatic amputation of other single finger (complete)(partial) | 2 (0-3) | 2 | 0.5200 |
| S699 | Unspecified injury of wrist and hand | 1 (1-2) | 1 | 0.7284 |
| S723/S7230/  S7231 | Fracture of shaft of femur | 3 (2-4) | 1 | 0.2355 |
| S798 | Other specified injuries of hip and thigh | 0 (0-0) | 3 | **0.0001** |
| S800 | Contusion of knee | 0 (0-1) | 2 | 0.0632 |
| S801 | Contusion of other and unspecified parts of lower leg | 1 (0-3) | 2 | 0.2663 |
| S807 | Multiple superficial injuries of lower leg | 0 (0-0) | 1 | **0.0253** |
| S808 | Other superficial injuries of lower leg | 0 (0-1) | 1 | 0.2003 |
| S809 | Superficial injury of lower leg, unspecified | 2 (0-4) | 0 | 0.1348 |
| S810 | Open wound of knee | 2 (0-4) | 0 | 0.1666 |
| S8220/S8221 | Fracture of shaft of tibia | 4 (1-6) | 1 | 0.0957 |
| S823/S8231 | Fracture of lower end of tibia | 2 (1-4) | 2 | 0.8202 |
| S898 | Other specified injuries of lower leg | 0 (0-0) | 1 | **0.0253** |
| S899 | Unspecified injury of lower leg | 1 (0-3) | 0 | 0.2424 |
| S900 | Contusion of ankle | 0 (0-1) | 1 | 0.2003 |
| S907 | Multiple superficial injuries of ankle and foot | 0 (0-1) | 1 | 0.2003 |
| S913 | Open wound of other parts of foot | 1 (0-2) | 1 | 1.0000 |
| T006 | Superficial injuries involving multiple regions of upper limb(s) with lower limb(s) | 0 (0-1) | 1 | 0.2003 |
| T139 | Unspecified injury of lower limb, level unspecified | 0 (0-0) | 1 | **0.0253** |
| T175 | Foreign body in bronchus | 0 (0-2) | 1 | 0.6423 |
| T179 | Foreign body in respiratory tract, part unspecified | 1 (0-4) | 2 | 0.7488 |
| T181 | Foreign body in oesophagus | 2 (1-5) | 1 | 0.2945 |
| T182 | Foreign body in stomach | 1 (0-3) | 0 | 0.2931 |
| T200 | Burn of unspecified degree of head and neck | 0 (0-1) | 1 | 0.2003 |
| T220 | Burn of unspecified degree of shoulder and upper limb, except wrist and hand | 0 (0-1) | 1 | 0.2003 |
| T310 | Burns involving less than 10% of body surface | 1 (0-1) | 1 | 0.8333 |
| T391 | Poisoning: 4-Aminophenol derivatives | 17 (15-20) | 8 | 0.0606 |
| T393 | Poisoning: Other nonsteroidal anti-inflammatory drugs [NSAID] | 6 (5-8) | 2 | 0.1380 |
| T402 | Poisoning: Other opioids | 1 (0-3) | 1 | 0.7284 |
| T424 | Poisoning: Benzodiazepines | 0 (0-0) | 1 | **0.0253** |
| T432 | Poisoning: Other and unspecified antidepressants | 3 (0-7) | 2 | 0.7867 |
| T433 | Poisoning: Phenothiazine antipsychotics and neuroleptics | 0 (0-1) | 1 | 0.2003 |
| T436 | Poisoning: Psychostimulants with abuse potential | 1 (0-2) | 1 | 0.6665 |
| T450 | Poisoning: Antiallergic and antiemetic drugs | 1 (0-2) | 0 | 0.3533 |
| T490 | Poisoning: Local antifungal, anti-infective and anti-inflammatory drugs, not elsewhere classified | 0 (0-0) | 1 | **0.0253** |
| T509 | Poisoning: Other and unspecified drugs, medicaments and biological substances | 0 (0-3) | 0 | 0.3533 |
| T510 | Toxic effect: Ethanol | 0 (0-3) | 2 | 0.2424 |
| T55X | Toxic effect of soaps and detergents | 0 (0-1) | 2 | **0.0172** |
| T68X | Hypothermia | 1 (0-3) | 3 | 0.0536 |
| T751 | Drowning and nonfatal submersion | 0 (0-2) | 1 | 0.4271 |
| T780 | Anaphylactic shock due to adverse food reaction | 3 (1-4) | 0 | 0.0564 |
| T781 | Other adverse food reactions, not elsewhere classified | 4 (1-4) | 2 | 0.5114 |
| T782 | Anaphylactic shock, unspecified | 1 (0-3) | 2 | 0.3894 |
| T784 | Allergy, unspecified | 1 (0-4) | 0 | 0.2012 |
| T801 | Vascular complications following infusion, transfusion and therapeutic injection | 0 (0-1) | 1 | 0.4271 |
| T808 | Other complications following infusion, transfusion and therapeutic injection | 1 (0-4) | 0 | 0.2931 |
| T810 | Haemorrhage and haematoma complicating a procedure, not elsewhere classified | 8 (6-12) | 1 | **0.0195** |
| T812 | Accidental puncture and laceration during a procedure, not elsewhere classified | 0 (0-4) | 2 | 0.3603 |
| T813 | Disruption of operation wound, not elsewhere classified | 3 (1-7) | 1 | 0.2415 |
| T814 | Infection following a procedure, not elsewhere classified | 2 (1-4) | 3 | 0.9348 |
| T818 | Other complications of procedures, not elsewhere classified | 0 (0-1) | 3 | **0.0062** |
| T825 | Mechanical complication of other cardiac and vascular devices and implants | 3 (0-6) | 4 | 0.6790 |
| T827 | Infection and inflammatory reaction due to other cardiac and vascular devices, implants and grafts | 2 (2-6) | 4 | 0.4225 |
| T850 | Mechanical complication of ventricular intracranial (communicating) shunt | 3 (2-5) | 1 | 0.2629 |
| T855 | Mechanical complication of gastrointestinal prosthetic devices, implants and grafts | 1 (1-3) | 1 | 0.6181 |
| T856 | Mechanical complication of other specified internal prosthetic devices, implants and grafts | 1 (0-2) | 2 | 0.2663 |
| T857 | Infection and inflammatory reaction due to other internal prosthetic devices, implants and grafts | 1 (0-3) | 1 | 0.8548 |
| T860 | Bone-marrow transplant rejection | 0 (0-0) | 1 | **0.0253** |
| T881 | Other complications following immunization, not elsewhere classified | 1 (0-4) | 0 | 0.1648 |
| **External causes of morbidity** | | | | |
| V031 | Pedestrian injured in collision with car, pick-up truck or van | 2 (1-4) | 1 | 0.5086 |
| V172/V173/  V174 | Pedal cyclist injured in collision with fixed or stationary object | 0 (0-1) | 2 | 0.0632 |
| V180/V181/  V182/V184/  V189 | Pedal cyclist injured in noncollision transport accident | 5 (1-10) | 4 | 0.6693 |
| V280/V282/  V284 | Motorcycle rider injured in noncollision transport accident | 1 (0-2) | 0 | 0.4274 |
| V800 | Rider or occupant injured by fall from or being thrown from animal or animal-drawn vehicle in noncollision accident | 1 (0-3) | 1 | 0.6181 |
| W010/W012/  W013/W014/  W015/W018/  W019 | Fall on same level from slipping, tripping and stumbling | 9 (4-12) | 4 | 0.1565 |
| W020/W023/  W024/W028/  W029 | Fall involving ice-skates, skis, roller-skates or skateboards | 3 (2-8) | 0 | **0.0284** |
| W040/W048/  W049 | Fall while being carried or supported by other persons | 1 (0-2) | 3 | 0.0825 |
| W060/W062/  W069 | Fall involving bed | 3 (2-3) | 5 | 0.2050 |
| W070/W072/  W075/W079 | Fall involving chair | 4 (0-5) | 1 | 0.2791 |
| W080/W082/  W083/W085/  W088/W089 | Fall involving other furniture | 4 (1-8) | 3 | 0.9690 |
| W090/W92/  W093/W095/  W098/W099 | Fall involving playground equipment | 18 (10-28) | 7 | **0.0362** |
| W100/W102/  W103/W109 | Fall on and from stairs and steps | 5 (3-7) | 0 | **0.0037** |
| W130/W132/  W133/W138/  W139 | Fall from, out of or through building or structure | 1 (1-3) | 0 | 0.1648 |
| W140/W142/  W144/W148/  W489 | Fall from tree | 1 (0-2) | 0 | 0.2925 |
| W170/W172/  W173/W174/  W175/W178/  W179 | Other fall from one level to another | 3 (1-5) | 1 | 0.2791 |
| W180/W182/  W183/W184/  W185/W188/  W189 | Other fall on same level | 8 (5-11) | 2 | 0.0618 |
| W190/W192/  W193/W194/  W195/W198/  W199 | Unspecified fall | 6 (2-9) | 1 | **0.0215** |
| W200/W202/  W205/W208/  W209 | Struck by thrown, projected or falling object | 3 (1-4) | 1 | 0.3560 |
| W210/W212/  W213/W218/  W219 | Striking against or struck by sports equipment | 3 (2-6) | 0 | **0.0458** |
| W220/W222/  W223/W224/  W225/W227/  W228/W229 | Striking against or struck by other objects | 5 (5-10) | 2 | **0.0382** |
| W230/W232/  W233/W234/  W236/W238/  W239 | Caught, crushed, jammed or pinched in or between objects | 8 (7-11) | 1 | **0.0039** |
| W250/W252/  W255/W256/  W258/W259 | Contact with sharp glass | 2 (0-3) | 0 | 0.1648 |
| W260/W261/  W262/W266/  W268/W269 | Contact with knife, sword or dagger | 3 (0-5) | 3 | 0.8641 |
| W290/W296 | Contact with other powered hand tools and household machinery | 0 (0-0) | 1 | **0.0253** |
| W348 | Discharge from other and unspecified firearms | 0 (0-0) | 1 | **0.0253** |
| W440/W441/  W442/W448/  W449 | Foreign body entering into or through eye or natural orifice | 8 (6-9) | 2 | **0.0086** |
| W450/W452/  W453/W458/  W459 | Foreign body or object entering through skin | 3 (1-4) | 1 | 0.2003 |
| W500/W502/  W503/W504/  W508/W509 | Hit, struck, kicked, twisted, bitten or scratched by another person | 5 (3-7) | 0 | **0.0220** |
| W510/W512/  W513/W515/  W518/W519 | Striking against or bumped into by another person | 2 (1-5) | 0 | 0.0893 |
| W540/W549/  W542/W544/  W545/W548 | Bitten or struck by dog | 5 (1-8) | 2 | 0.2881 |
| W550/W557/  W558/W559 | Bitten or struck by other mammals | 1 (0-6) | 0 | 0.1666 |
| W579/W570 | Bitten or stung by nonvenomous insect and other nonvenomous arthropods | 1 (1-2) | 0 | 0.2003 |
| W670/W673 | Drowning and submersion while in swimming-pool | 0 (0-1) | 1 | 0.2003 |
| W780 | Inhalation of gastric contents | 0 (0-1) | 1 | 0.4271 |
| W790/W792 | Inhalation and ingestion of food causing obstruction of respiratory tract | 0 (0-1) | 2 | **0.0172** |
| W800/W802/  W809 | Inhalation and ingestion of other objects causing obstruction of respiratory tract | 1 (0-3) | 0 | 0.2424 |
| X100 | Contact with hot drinks, food, fats and cooking oils | 0 (0-2) | 1 | 0.4271 |
| X400/X402/  X409 | Accidental poisoning by and exposure to nonopioid analgesics, antipyretics and antirheumatics | 7 (4-9) | 2 | 0.0553 |
| X410/X412/  X419 | Accidental poisoning by and exposure to antiepileptic, sedative-hypnotic, antiparkinsonism and psychotropic drugs, not elsewhere classified | 0 (0-1) | 1 | 0.2003 |
| X420/X422/  X429 | Accidental poisoning by and exposure to narcotics and psychodysleptics [hallucinogens], not elsewhere classified | 0 (0-1) | 1 | 0.2003 |
| X440/X442/  X444/X445/  X448/X449 | Accidental poisoning by and exposure to other and unspecified drugs, medicaments and biological substances | 1 (0-4) | 2 | 0.7845 |
| X460/X469 | Accidental poisoning by and exposure to organic solvents and halogenated hydrocarbons and their vapours | 1 (0-2) | 0 | 0.2424 |
| X490/X491/  X492/X498/  X499 | Accidental poisoning by and exposure to other and unspecified chemicals and noxious substances | 2 (1-3) | 2 | 0.7845 |
| X580/X582/  X588/X589 | Exposure to other specified factors | 1 (0-5) | 0 | 0.2019 |
| X590/X592/  X599 | Exposure to unspecified factor | 6 (3-13) | 10 | 0.7924 |
| X600/601/  X602/X604/  X605/X606/  X609 | Intentional self-poisoning by and exposure to nonopioid analgesics, antipyretics and antirheumatics | 15 (11-17) | 7 | 0.0874 |
| X610/X611/  X612/X618/  X619 | Intentional self-poisoning by and exposure to antiepileptic, sedative-hypnotic, antiparkinsonism and psychotropic drugs, not elsewhere classified | 3 (1-10) | 4 | 0.7661 |
| X620/X621/  X622/X624/  X625/X628/  X629 | Intentional self-poisoning by and exposure to narcotics and psychodysleptics [hallucinogens], not elsewhere classified | 2 (0-5) | 0 | 0.1359 |
| X640/X641/  X642/X644/  X649 | Intentional self-poisoning by and exposure to other and unspecified drugs, medicaments and biological substances | 3 (0-4) | 0 | 0.1106 |
| X650/X652/  X654/X659 | Intentional self-poisoning by and exposure to alcohol | 1 (0-3) | 2 | 0.4874 |
| X780/X789/  X782 | Intentional self-harm by sharp object | 4 (0-9) | 0 | **0.0285** |
| Y400 | Penicillins | 1 (0-2) | 1 | 1.0000 |
| Y420 | Glucocorticoids and synthetic analogues | 0 (0-0) | 6 | **0.0001** |
| Y430 | Antiallergic and antiemetic drugs | 0 (0-0) | 1 | **0.0253** |
| Y433 | Other antineoplastic drugs | 4 (2-7) | 5 | 0.6816 |
| Y599 | Vaccine or biological substance, unspecified | 0 (0-3) | 0 | 0.2925 |
| Y600 | During surgical operation | 0 (0-3) | 1 | 1.0000 |
| Y831 | Surgical operation with implant of artificial internal device | 1 (0-3) | 1 | 0.9778 |
| Y832 | Surgical operation with anastomosis, bypass or graft | 0 (0-4) | 0 | 0.3533 |
| Y833 | Surgical operation with formation of external stoma | 1 (0-2) | 1 | 1.0000 |
| Y834 | Other reconstructive surgery | 2 (1-2) | 0 | 0.1659 |
| Y836 | Removal of other organ (partial) (total) | 9 (8-13) | 2 | **0.0095** |
| Y838 | Other surgical procedures | 2 (0-3) | 0 | 0.2432 |
| Y842 | Radiological procedure and radiotherapy | 0 (0-1) | 1 | 0.2003 |
| Y848 | Other medical procedures | 1 (0-4) | 1 | 0.9044 |
| Y95X | Nosocomial condition | 0 (0-1) | 1 | 0.4271 |
| **Factors influencing health status and contact with health services** | | | | |
| U808 | Agent resistant to other penicillin-related antibiotic | 0 (0-14) | 0 | 0.3535 |
| U818 | Agent resistant to other vancomycin-related antibiotic | 0 (0-7) | 0 | 0.3535 |
| U820 | Resistance to penicillin | 1 (0-3) | 0 | 1.0000 |
| U821 | Resistance to methicillin | 1 (0-1) | 3 | 1.0000 |
| U828 | Resistance to other betalactam antibiotics | 0 (0-1) | 3 | 1.0000 |
| U837 | Resistance to multiple antibiotics | 0 (0-2) | 2 | 1.0000 |
| U898 | Agent resistant to other single specified antibiotic | 0 (0-12) | 0 | 0.2936 |
| Z000 | General medical examination | 0 (0-0) | 1 | **0.0253** |
| Z036 | Observation for suspected toxic effect from ingested substance | 2 (1-5) | 0 | 0.0893 |
| Z038 | Observation for other suspected diseases and conditions | 9 (7-15) | 97 | **0.0000** |
| Z043 | Examination and observation following other accident | 1 (0-4) | 0 | 0.2432 |
| Z045 | Examination and observation following other inflicted injury | 0 (0-1) | 1 | 0.4271 |
| Z048 | Examination and observation for other specified reasons | 0 (0-1) | 2 | 0.0632 |
| Z098 | Follow-up examination after other treatment for other conditions | 0 (0-3) | 1 | 0.6423 |
| Z099 | Follow-up examination after unspecified treatment for other conditions | 0 (0-3) | 4 | **0.0069** |
| Z115 | Special screening examination for other viral diseases | 0 (0-0) | 47 | **0.0000** |
| Z138 | Special screening examination for other specified diseases and disorders | 4 (0-5) | 0 | 0.0915 |
| Z208 | Contact with and exposure to other communicable diseases | 1 (0-3) | 1 | 0.7284 |
| Z223 | Carrier of other specified bacterial diseases | 0 (0-1) | 1 | 0.2003 |
| Z470 | Follow-up care involving removal of fracture plate and other internal fixation device | 0 (0-2) | 1 | 0.6423 |
| Z501 | Other physical therapy | 1 (0-41) | 26 | 0.0793 |
| Z504 | Psychotherapy, not elsewhere classified | 0 (0-15) | 12 | **0.0006** |
| Z505 | Speech therapy | 0 (0-6) | 2 | 0.9474 |
| Z507 | Occupational therapy and vocational rehabilitation, not elsewhere classified | 0 (0-7) | 2 | 0.6023 |
| Z530 | Procedure not carried out because of contraindication | 0 (0-2) | 2 | 0.5731 |
| Z538 | Procedure not carried out for other reasons | 1 (1-2) | 1 | 0.8548 |
| Z587 | Exposure to tobacco smoke | 0 (0-8) | 0 | 0.2935 |
| Z608 | Other problems related to social environment | 2 (0-5) | 0 | 0.1368 |
| Z609 | Problem related to social environment, unspecified | 1 (0-3) | 0 | 0.3535 |
| Z611 | Removal from home in childhood | 0 (0-0) | 2 | **0.0253** |
| Z618 | Other negative life events in childhood | 0 (0-3) | 1 | 1.0000 |
| Z634 | Disappearance and death of family member | 0 (0-2) | 2 | 0.2424 |
| Z638 | Other specified problems related to primary support group | 8 (4-15) | 6 | 0.3331 |
| Z713 | Dietary counselling and surveillance | 1 (0-5) | 11 | **0.0002** |
| Z721 | Alcohol use | 0 (0-1) | 1 | 0.2003 |
| Z762 | Health supervision and care of other healthy infant and child | 7 (2-8) | 2 | 0.1374 |
| Z800 | Family history of malignant neoplasm of digestive organs | 0 (0-1) | 2 | 0.1849 |
| Z811 | Family history of alcohol abuse | 1 (0-3) | 0 | 0.2925 |
| Z812 | Family history of tobacco abuse | 0 (0-5) | 0 | 0.3533 |
| Z813 | Family history of other psychoactive substance abuse | 1 (0-3) | 1 | 0.8347 |
| Z818 | Family history of other mental and behavioural disorders | 4 (1-10) | 10 | 0.0610 |
| Z820 | Family history of epilepsy and other diseases of the nervous system | 6 (2-10) | 12 | 0.1535 |
| Z823 | Family history of stroke | 0 (0-1) | 2 | 0.0632 |
| Z824 | Family history of ischaemic heart disease and other diseases of the circulatory system | 4 (1-7) | 5 | 0.2606 |
| Z825 | Family history of asthma and other chronic lower respiratory diseases | 26 (6-33) | 26 | 0.5393 |
| Z826 | Family history of arthritis and other diseases of the musculoskeletal system and connective tissue | 1 (0-3) | 1 | 0.8347 |
| Z827 | Family history of congenital malformations, deformations and chromosomal abnormalities | 2 (0-5) | 2 | 0.9318 |
| Z831 | Family history of other infectious and parasitic diseases | 1 (0-3) | 6 | **0.0043** |
| Z832 | Family history of diseases of the blood and blood-forming organs and certain disorders involving the immune mechanism | 1 (0-2) | 2 | 0.3603 |
| Z833 | Family history of diabetes mellitus | 3 (1-7) | 14 | **0.0111** |
| Z834 | Family history of other endocrine, nutritional and metabolic diseases | 1 (0-2) | 9 | **0.0014** |
| Z835 | Family history of eye and ear disorders | 0 (0-1) | 2 | **0.0172** |
| Z836 | Family history of diseases of the respiratory system | 1 (0-4) | 17 | **0.0000** |
| Z837 | Family history of diseases of the digestive system | 3 (2-5) | 5 | 0.2486 |
| Z840 | Family history of diseases of the skin and subcutaneous tissue | 1 (0-5) | 8 | **0.0036** |
| Z842 | Family history of other diseases of the genitourinary system | 0 (0-5) | 6 | **0.0020** |
| Z843 | Family history of consanguinity | 1 (1-3) | 4 | 0.2348 |
| Z848 | Family history of other specified conditions | 0 (0-1) | 5 | **0.0009** |
| Z858 | Personal history of malignant neoplasms of other organs and systems | 1 (0-3) | 2 | 0.5200 |
| Z860 | Personal history of other neoplasms | 1 (0-9) | 0 | 0.2024 |
| Z861 | Personal history of infectious and parasitic diseases | 10 (5-41) | 15 | 0.5359 |
| Z862 | Personal history of diseases of the blood and blood-forming organs and certain disorders involving the immune mechanism | 0 (0-2) | 3 | **0.0062** |
| Z863 | Personal history of endocrine, nutritional and metabolic diseases | 0 (0-2) | 5 | **0.0001** |
| Z865 | Personal history of other mental and behavioural disorders | 0 (0-2) | 1 | 0.6423 |
| Z866 | Personal history of diseases of the nervous system and sense organs | 11 (5-30) | 20 | 0.2067 |
| Z867 | Personal history of diseases of the circulatory system | 4 (2-13) | 1 | 0.1039 |
| Z870 | Personal history of diseases of the respiratory system | 60 (17-108) | 42 | 0.4987 |
| Z871 | Personal history of diseases of the digestive system | 10 (3-21) | 15 | 0.3974 |
| Z872 | Personal history of diseases of the skin and subcutaneous tissue | 1 (0-6) | 3 | 0.1323 |
| Z873 | Personal history of diseases of the musculoskeletal system and connective tissue | 1 (0-4) | 2 | 0.9558 |
| Z874 | Personal history of diseases of the genitourinary system | 12 (7-23) | 19 | 0.2441 |
| Z876 | Personal history of certain conditions arising in the perinatal period | 35 (14-56) | 38 | 0.7727 |
| Z877 | Personal history of congenital malformations, deformations and chromosomal abnormalities | 18 (13-26) | 17 | 0.9585 |
| Z878 | Personal history of other specified conditions | 0 (0-1) | 2 | **0.0172** |
| Z880 | Personal history of allergy to penicillin | 20 (16-24) | 10 | 0.0720 |
| Z881 | Personal history of allergy to other antibiotic agents | 1 (1-5) | 7 | **0.0087** |
| Z884 | Personal history of allergy to anaesthetic agent | 0 (0-0) | 2 | **0.0014** |
| Z885 | Personal history of allergy to narcotic agent | 0 (0-0) | 2 | **0.0014** |
| Z886 | Personal history of allergy to analgesic agent | 0 (0-1) | 3 | **0.0062** |
| Z888 | Personal history of allergy to other drugs, medicaments and biological substances | 5 (0-10) | 11 | **0.0118** |
| Z904 | Acquired absence of other parts of digestive tract | 3 (0-6) | 9 | 0.3000 |
| Z905 | Acquired absence of kidney | 3 (0-5) | 6 | 0.0698 |
| Z907 | Acquired absence of genital organ(s) | 0 (0-2) | 5 | **0.0156** |
| Z908 | Acquired absence of other organs | 0 (0-0) | 2 | **0.0014** |
| Z910 | Personal history of allergy, other than to drugs and biological substances | 8 (2-38) | 25 | **0.0203** |
| Z911 | Personal history of noncompliance with medical treatment and regimen | 0 (0-3) | 2 | 0.1580 |
| Z915 | Personal history of self-harm | 16 (15-17) | 12 | 0.4241 |
| Z916 | Personal history of other physical trauma | 7 (0-10) | 3 | 0.3513 |
| Z918 | Personal history of other specified risk-factors, not elsewhere classified | 0 (0-3) | 1 | 0.6665 |
| Z921 | Personal history of long-term (current) use of anticoagulants | 0 (0-4) | 1 | 0.8333 |
| Z922 | Personal history of long-term (current) use of other medicaments | 5 (1-8) | 17 | **0.0001** |
| Z923 | Personal history of irradiation | 0 (0-2) | 10 | **0.0001** |
| Z924 | Personal history of major surgery, not elsewhere classified | 19 (13-21) | 28 | **0.0404** |
| Z926 | Personal history of chemotherapy for neoplastic disease | 4 (2-7) | 12 | **0.0091** |
| Z930 | Tracheostomy status | 3 (0-3) | 2 | 0.9121 |
| Z931 | Gastrostomy status | 16 (9-27) | 11 | 0.4330 |
| Z932 | Ileostomy status | 5 (1-7) | 2 | 0.5988 |
| Z933 | Colostomy status | 1 (1-2) | 0 | 0.2003 |
| Z934 | Other artificial openings of gastrointestinal tract status | 3 (1-4) | 0 | 0.0724 |
| Z936 | Other artificial openings of urinary tract status | 0 (0-1) | 3 | 0.0545 |
| Z940 | Kidney transplant status | 0 (0-3) | 3 | 0.0644 |
| Z948 | Other transplanted organ and tissue status | 1 (0-5) | 11 | **0.0029** |
| Z952 | Presence of prosthetic heart valve | 0 (0-1) | 1 | 0.2003 |
| Z955 | Presence of coronary angioplasty implant and graft | 0 (0-1) | 1 | 0.2003 |
| Z958 | Presence of other cardiac and vascular implants and grafts | 3 (1-8) | 8 | 0.1311 |
| Z960 | Presence of urogenital implants | 1 (0-1) | 1 | 0.8333 |
| Z962 | Presence of otological and audiological implants | 2 (0-4) | 0 | 0.1359 |
| Z968 | Presence of other specified functional implants | 1 (0-4) | 3 | 0.5714 |
| Z974 | Presence of external hearing-aid | 1 (0-3) | 0 | 0.2003 |
| Z980 | Intestinal bypass and anastomosis status | 1 (0-2) | 1 | 0.8333 |
| Z982 | Presence of cerebrospinal fluid drainage device | 10 (8-13) | 5 | 0.0897 |
| Z991 | Dependence on respirator | 2 (0-7) | 0 | 0.1127 |
| Z993 | Dependence on wheelchair | 1 (0-3) | 2 | 0.3894 |
| Z998 | Dependence on other enabling machines and devices | 3 (0-4) | 1 | 0.4952 |

Diagnosis at discharge is shown for patients admitted during the 7 weeks of full national lockdown, as numbers admitted during this period (2020) and median (range) for those during matched periods in 2015-2019. Only diagnoses which occurred with a median of once per year in 2015-2019 or had >1 occurrence in 2020 were included in this analysis. * P value calculated using weekly admissions with given diagnosis for the 7 weeks of lockdown (2020) or the matched 7 weeks in each of 2015-2019 (n=35 weeks). P values represent independent-samples Kruskal-Wallis test, controlled for multiple comparisons with stepwise step-down. P values of <0.05 were taken as significant and are highlighted in bold.

**Supplemental Table 4: Discharge diagnoses by ICD-10 sub-chapter headings**

| **ICD-10 Chapter sub-headings** | **Median (range) admissions 2015-2019 matched for lockdown** | **Median (range) admissions 2020 lockdown** | **P value** |
| --- | --- | --- | --- |
| **Certain infectious and parasitic diseases** | | | |
| Intestinal infectious diseases | 78 (53-94) | 25 | **0.0001** |
| Tuberculosis | 0 (0-1) | 0 | 0.5220 |
| Other bacterial diseases | 29 (21-30) | 20 | 0.1118 |
| Other spirochetal diseases | 0 (0-1) | 0 | 0.6547 |
| Viral and prion infections of the central nervous system | 5 (2-15) | 1 | 0.0625 |
| Arthropod-borne viral fevers and viral hemorrhagic fevers | 0 (0-1) | 0 | 1.0000 |
| Viral infections characterized by skin and mucous membrane lesions | 27 (11-34) | 6 | **0.0017** |
| Viral hepatitis | 0 (0-1) | 0 | 0.6547 |
| Other viral diseases | 131 (123-171) | 37 | **0.0001** |
| Mycoses | 10 (4-14) | 9 | 0.9437 |
| Protozoal diseases | 0 (0-1) | 0 | 0.6547 |
| Helminthiases | 1 (0-1) | 1 | 0.6423 |
| Pediculosis, acariasis and other infestations | 0 (0-1) | 0 | 0.6547 |
| Bacterial and viral infectious agents | 58 (46-67) | 38 | **0.0351** |
| Other infectious diseases | 0 (0-0) | 0 | 1.0000 |
| **Neoplasms** | | | |
| Malignant neoplasms of digestive organs | 0 (0-1) | 1 | 0.2003 |
| Malignant neoplasms of respiratory and intrathoracic organs | 0 (0-1) | 0 | 0.6547 |
| Malignant neoplasms of bone and articular cartilage | 2 (0-7) | 5 | 0.8632 |
| Malignant neoplasms of mesothelial and soft tissue | 0 (0-5) | 3 | 0.0536 |
| Malignant neoplasms of urinary tract | 2 (0-3) | 4 | 0.1373 |
| Malignant neoplasms of eye, brain and other parts of central nervous system | 5 (0-7) | 13 | **0.0090** |
| Malignant neoplasms of thyroid and other endocrine glands | 0 (0-1) | 1 | 0.2003 |
| Malignant neoplasms of ill-defined, other secondary and unspecified sites | 4 (2-7) | 13 | **0.0017** |
| Malignant neoplasms of lymphoid, hematopoietic and related tissue | 16 (12-32) | 21 | 0.7315 |
| Benign neoplasms, except benign neuroendocrine tumors | 9 (2-23) | 11 | 0.4521 |
| Neoplasms of uncertain behavior, polycythemia vera and myelodysplastic syndromes | 0 (0-10) | 4 | 0.5249 |
| **Diseases of the blood and blood-forming organs and certain disorders involving the immune mechanism** | | | |
| Nutritional anemias | 4 (0-9) | 10 | 0.1019 |
| Hemolytic anemias | 12 (8-16) | 8 | 0.3060 |
| Aplastic and other anemias and other bone marrow failure syndromes | 6 (4-22) | 5 | 0.2333 |
| Coagulation defects, purpura and other hemorrhagic conditions | 18 (10-27) | 8 | **0.0359** |
| Other disorders of blood and blood-forming organs | 12 (8-16) | 11 | 0.9442 |
| Certain disorders involving the immune mechanism | 3 (1-8) | 6 | 0.4715 |
| **Endocrine, nutritional and metabolic diseases** | | | |
| Disorders of thyroid gland | 3 (0-5) | 3 | 0.7511 |
| Diabetes mellitus | 10 (9-16) | 13 | 0.4668 |
| Other disorders of glucose regulation and pancreatic internal secretion | 8 (6-19) | 4 | **0.0395** |
| Disorders of other endocrine glands | 8 (4-12) | 14 | 0.1223 |
| Malnutrition | 0 (0-2) | 0 | 0.5221 |
| Other nutritional deficiencies | 6 (3-14) | 2 | 0.1646 |
| Overweight, obesity and other hyperalimentation | 2 (2-6) | 3 | 0.7948 |
| Metabolic disorders | 41 (32-54) | 52 | 0.6339 |
| Postprocedural endocrine and metabolic complications and disorders, not elsewhere classified | 0 (0-1) | 0 | 0.6547 |
| **Mental, Behavioural and Neurodevelopmental disorders** | | | |
| Mental disorders due to known physiological conditions | 0 (0-2) | 0 | 0.5220 |
| Mental and behavioural disorders due to psychoactive substance use | 3 (0-9) | 2 | 0.3041 |
| Mood [affective] disorders | 5 (3-7) | 5 | 0.8546 |
| Anxiety, dissociative, stress-related, somatoform and other nonpsychotic mental disorders | 13 (6-19) | 15 | 0.4437 |
| Behavioural syndromes associated with physiological disturbances and physical factors | 3 (1-6) | 6 | 0.1601 |
| Disorders of adult personality and behaviour | 1 (0-2) | 0 | 0.3529 |
| Intellectual disabilities | 0 (0-1) | 0 | 0.5220 |
| Pervasive and specific developmental disorders | 46 (29-99) | 46 | 0.6348 |
| Behavioural and emotional disorders with onset usually occurring in childhood and adolescence | 6 (5-22) | 11 | 0.5283 |
| **Diseases of the nervous system** | | | |
| Inflammatory diseases of the central nervous system | 11 (10-34) | 9 | 0.3263 |
| Systemic atrophies primarily affecting the central nervous system | 3 (1-5) | 2 | 0.5630 |
| Extrapyramidal and movement disorders | 3 (3-6) | 7 | 0.1352 |
| Other degenerative diseases of the nervous system | 1 (0-3) | 0 | 0.2931 |
| Demyelinating diseases of the central nervous system | 1 (0-2) | 0 | 0.3533 |
| Episodic and paroxysmal disorders | 43 (35-65) | 38 | 0.2916 |
| Nerve, nerve root and plexus disorders | 4 (1-6) | 3 | 0.7354 |
| Polyneuropathies and other disorders of the peripheral nervous system | 0 (0-2) | 4 | **0.0019** |
| Diseases of myoneural junction and muscle | 1 (0-5) | 7 | **0.0144** |
| Cerebral palsy and other paralytic syndromes | 19 (9-20) | 7 | **0.0309** |
| Other disorders of the nervous system | 20 (15-30) | 27 | 0.4832 |
| **Diseases of the eye and adnexa** | | | |
| Disorders of eyelid, lacrimal system and orbit | 12 (11-15) | 6 | 0.1174 |
| Disorders of conjunctiva | 9 (6-14) | 2 | **0.0098** |
| Disorders of sclera, cornea, iris and ciliary body | 1 (0-5) | 2 | 0.9377 |
| Disorders of lens | 1 (0-1) | 1 | 0.6423 |
| Disorders of choroid and retina | 3 (1-6) | 5 | 0.6947 |
| Glaucoma | 0 (0-2) | 1 | 0.6423 |
| Disorders of vitreous body and globe | 0 (0-2) | 0 | 0.3529 |
| Disorders of optic nerve and visual pathways | 2 (0-5) | 3 | 0.6075 |
| Disorders of ocular muscles, binocular movement, accommodation and refraction | 8 (5-9) | 13 | 0.3517 |
| Visual disturbances and blindness | 16 (11-22) | 16 | 0.4131 |
| Other disorders of eye and adnexa | 6 (1-7) | 1 | 0.0679 |
| **Diseases of the ear and mastoid process** | | | |
| Diseases of external ear | 3 (2-15) | 2 | 0.4139 |
| Diseases of middle ear and mastoid | 27 (17-45) | 8 | **0.0037** |
| Diseases of inner ear | 0 (0-1) | 0 | 0.6547 |
| Other disorders of ear | 10 (6-14) | 5 | 0.1042 |
| **Diseases of the circulatory system** | | | |
| Chronic rheumatic heart diseases | 1 (0-3) | 2 | 0.2663 |
| Hypertensive diseases | 1 (0-3) | 12 | **0.0002** |
| Ischemic heart diseases | 0 (0-3) | 0 | 0.3529 |
| Pulmonary heart disease and diseases of pulmonary circulation | 1 (0-3) | 2 | 0.6181 |
| Other forms of heart disease | 13 (6-15) | 8 | 0.2162 |
| Cerebrovascular diseases | 3 (2-10) | 4 | 0.5326 |
| Diseases of arteries, arterioles and capillaries | 1 (0-3) | 0 | 0.2012 |
| Diseases of veins, lymphatic vessels and lymph nodes, not elsewhere classified | 6 (2-9) | 8 | 0.3058 |
| Other and unspecified disorders of the circulatory system | 3 (2-4) | 1 | 0.2791 |
| **Diseases of the respiratory system** | | | |
| Acute upper respiratory infections | 150 (132-192) | 38 | **0.0000** |
| Influenza and pneumonia | 29 (25-46) | 13 | **0.0018** |
| Other acute lower respiratory infections | 99 (65-109) | 30 | **0.0001** |
| Other diseases of upper respiratory tract | 23 (18-46) | 20 | 0.1819 |
| Chronic lower respiratory diseases | 75 (63-89) | 28 | **0.0007** |
| Lung diseases due to external agents | 2 (0-3) | 3 | 0.2777 |
| Other respiratory diseases principally affecting the interstitium | 0 (0-1) | 1 | 0.4271 |
| Suppurative and necrotic conditions of the lower respiratory tract | 2 (0-4) | 1 | 0.6026 |
| Other diseases of the pleura | 5 (2-16) | 3 | 0.3541 |
| Intraoperative and postprocedural complications and disorders of respiratory system, not elsewhere classified | 0 (0-1) | 1 | 0.4271 |
| Other diseases of the respiratory system | 12 (11-15) | 7 | 0.0808 |
| **Diseases of the digestive system** | | | |
| Diseases of oral cavity and salivary glands | 18 (10-28) | 13 | 0.4564 |
| Diseases of esophagus, stomach and duodenum | 54 (29-66) | 34 | **0.0472** |
| Diseases of appendix | 20 (13-29) | 13 | 0.3020 |
| Hernia | 12 (8-19) | 4 | **0.0263** |
| Noninfective enteritis and colitis | 6 (3-7) | 0 | **0.0064** |
| Other diseases of intestines | 54 (33-65) | 51 | 0.8385 |
| Diseases of peritoneum and retroperitoneum | 5 (0-6) | 2 | 0.4320 |
| Diseases of liver | 1 (0-2) | 3 | 0.0644 |
| Disorders of gallbladder, biliary tract and pancreas | 2 (1-5) | 2 | 0.7423 |
| Other diseases of the digestive system | 44 (25-53) | 34 | 0.2374 |
| **Diseases of the skin and subcutaneous tissue** | | | |
| Infections of the skin and subcutaneous tissue | 35 (28-48) | 14 | **0.0042** |
| Other disorders of the skin and subcutaneous tissue | 10 (8-22) | 8 | 0.4637 |
| Bullous disorders | 0 (0-0) | 1 | **0.0253** |
| Dermatitis and eczema | 62 (40-90) | 49 | 0.1917 |
| Papulosquamous disorders | 0 (0-3) | 0 | 0.4274 |
| Urticaria and erythema | 8 (3-12) | 2 | 0.0697 |
| Radiation-related disorders of the skin and subcutaneous tissue | 0 (0-0) | 0 | 1.0000 |
| Disorders of skin appendages | 2 (1-4) | 2 | 0.9658 |
| **Diseases of the musculoskeletal system and connective tissue** | | | |
| Infectious arthropathies | 3 (2-4) | 0 | 0.0750 |
| Inflammatory polyarthropathies | 2 (0-2) | 3 | 0.2576 |
| Osteoarthritis | 0 (0-1) | 0 | 0.6547 |
| Other joint disorders | 22 (17-31) | 10 | **0.0022** |
| Systemic connective tissue disorders | 3 (2-8) | 4 | 0.3488 |
| Deforming dorsopathies | 4 (2-12) | 8 | 0.4366 |
| Spondylopathies | 0 (0-2) | 0 | 0.4271 |
| Other dorsopathies | 6 (3-16) | 3 | 0.0728 |
| Disorders of muscles | 5 (2-9) | 2 | 0.1725 |
| Disorders of synovium and tendon | 15 (5-18) | 2 | **0.0253** |
| Other soft tissue disorders | 12 (11-21) | 5 | **0.0045** |
| Disorders of bone density and structure | 2 (0-3) | 0 | 0.2432 |
| Other osteopathies | 6 (2-14) | 3 | 0.4650 |
| Chondropathies | 2 (1-3) | 0 | 0.1359 |
| Other disorders of the musculoskeletal system and connective tissue | 0 (0-0) | 0 | 1.0000 |
| Intraoperative and postprocedural complications and disorders of musculoskeletal system, not elsewhere classified | 0 (0-2) | 0 | 0.5220 |
| **Diseases of the genitourinary system** | | | |
| Glomerular diseases | 0 (0-2) | 0 | 0.4271 |
| Renal tubulo-interstitial diseases | 6 (4-16) | 15 | **0.0410** |
| Acute kidney failure and chronic kidney disease | 6 (2-9) | 9 | 0.3244 |
| Urolithiasis | 1 (0-2) | 1 | 1.0000 |
| Other disorders of kidney and ureter | 2 (0-6) | 5 | 0.0901 |
| Other diseases of the urinary system | 37 (33-65) | 27 | 0.0739 |
| Diseases of male genital organs | 13 (8-20) | 19 | 0.2643 |
| Disorders of breast | 1 (0-2) | 0 | 0.4274 |
| Inflammatory diseases of female pelvic organs | 2 (1-4) | 1 | 0.3560 |
| Noninflammatory disorders of female genital tract | 5 (3-9) | 3 | 0.2902 |
| Intraoperative and postprocedural complications and disorders of genitourinary system, not elsewhere classified | 0 (0-1) | 0 | 0.5220 |
| **Certain conditions originating in the perinatal period** | | | |
| Newborn affected by maternal factors and by complications of pregnancy, labor, and delivery | 0 (0-3) | 0 | 0.4271 |
| Disorders of newborn related to length of gestation and fetal growth | 15 (4-28) | 9 | 0.5480 |
| Birth trauma | 2 (0-5) | 1 | 0.4156 |
| Respiratory and cardiovascular disorders specific to the perinatal period | 32 (12-43) | 21 | 0.2615 |
| Infections specific to the perinatal period | 21 (11-37) | 17 | 0.3796 |
| Hemorrhagic and hematological disorders of newborn | 16 (6-25) | 13 | 0.2441 |
| Transitory endocrine and metabolic disorders specific to newborn | 12 (6-14) | 6 | 0.2498 |
| Digestive system disorders of newborn | 13 (4-14) | 9 | 0.8075 |
| Conditions involving the integument and temperature regulation of newborn | 6 (3-11) | 8 | 0.8709 |
| Other disorders originating in the perinatal period | 25 (21-40) | 28 | 0.9455 |
| **Congenital malformations, deformations and chromosomal abnormalities** | | | |
| Congenital malformations of the nervous system | 18 (14-30) | 12 | 0.1205 |
| Congenital malformations of eye, ear, face and neck | 2 (0-5) | 4 | 0.7592 |
| Congenital malformations of the circulatory system | 31 (14-41) | 29 | 0.9321 |
| Congenital malformations of the respiratory system | 6 (5-18) | 4 | 0.0947 |
| Cleft lip and cleft palate | 1 (0-3) | 5 | 0.3098 |
| Other congenital malformations of the digestive system | 17 (10-20) | 7 | **0.0495** |
| Congenital malformations of genital organs | 6 (3-13) | 19 | **0.0180** |
| Congenital malformations of the urinary system | 10 (9-11) | 9 | 0.9028 |
| Congenital malformations and deformations of the musculoskeletal system | 22 (9-25) | 14 | 0.6059 |
| Other congenital malformations | 8 (5-16) | 7 | 0.5725 |
| Chromosomal abnormalities, not elsewhere classified | 17 (7-26) | 7 | **0.0141** |
| **Symptoms, signs and abnormal clinical and laboratory findings, not elsewhere classified** | | | |
| Symptoms and signs involving the circulatory and respiratory systems | 182 (179-234) | 117 | **0.0013** |
| Symptoms and signs involving the digestive system and abdomen | 171 (150-208) | 62 | **0.0001** |
| Symptoms and signs involving the skin and subcutaneous tissue | 89 (62-104) | 22 | **0.0000** |
| Symptoms and signs involving the nervous and musculoskeletal systems | 38 (25-54) | 29 | 0.1907 |
| Symptoms and signs involving the genitourinary system | 17 (14-19) | 5 | **0.0129** |
| Symptoms and signs involving cognition, perception, emotional state and behaviour | 30 (22-44) | 20 | 0.1623 |
| Symptoms and signs involving speech and voice | 3 (1-6) | 3 | 0.6946 |
| General symptoms and signs | 294 (222-348) | 160 | **0.0018** |
| Abnormal findings on examination of blood, without diagnosis | 6 (1-12) | 5 | 0.6094 |
| Abnormal findings on examination of urine, without diagnosis | 6 (2-11) | 4 | 0.5515 |
| Abnormal findings on examination of other body fluids, substances and tissues, without diagnosis | 6 (0-27) | 3 | 0.1435 |
| Abnormal findings on diagnostic imaging and in function studies, without diagnosis | 4 (2-6) | 8 | 0.3678 |
| **Injury, poisoning and certain other consequences of external causes** | | | |
| Injuries to the head | 84 (73-88) | 33 | **0.0013** |
| Injuries to the neck | 4 (0-6) | 1 | 0.2550 |
| Injuries to the thorax | 7 (5-13) | 0 | **0.0138** |
| Injuries to the abdomen, lower back, lumbar spine, pelvis and external genitals | 13 (9-16) | 3 | **0.0396** |
| Injuries to the shoulder and upper arm | 16 (6-21) | 6 | **0.0100** |
| Injuries to the elbow and forearm | 31 (26-45) | 19 | **0.0384** |
| Injuries to the wrist, hand and fingers | 35 (28-43) | 7 | **0.0003** |
| Injuries to the hip and thigh | 6 (5-12) | 4 | 0.2123 |
| Injuries to the knee and lower leg | 19 (8-24) | 10 | 0.1356 |
| Injuries to the ankle and foot | 7 (4-10) | 3 | 0.1157 |
| Injuries involving multiple body regions | 2 (0-5) | 2 | 0.8560 |
| Injury of unspecified body region | 1 (0-1) | 0 | 0.4271 |
| Effects of foreign body entering through natural orifice | 9 (7-13) | 4 | 0.0598 |
| Burns and corrosions | 2 (1-14) | 3 | 0.4455 |
| Poisoning by, adverse effect of and underdosing of drugs, medicaments and biological substances | 48 (37-54) | 30 | 0.0573 |
| Toxic effects of substances chiefly nonmedicinal as to source | 6 (1-8) | 4 | 0.6713 |
| Other and unspecified effects of external causes | 14 (5-18) | 8 | 0.3147 |
| Certain early complications of trauma | 0 (0-4) | 0 | 0.4274 |
| Complications of surgical and medical care, not elsewhere classified | 37 (33-46) | 25 | 0.0915 |
| **External causes of morbidity and mortality** | | | |
| Transport accidents | 20 (12-23) | 8 | 0.2285 |
| Slipping, tripping, stumbling and falls | 75 (39-76) | 27 | **0.0002** |
| Exposure to inanimate mechanical forces | 37 (33-44) | 12 | **0.0003** |
| Exposure to animate mechanical forces | 13 (12-25) | 2 | **0.0011** |
| Accidental non-transport drowning and submersion | 0 (0-1) | 1 | 0.4057 |
| Accidental exposure to other specified factors | 4 (0-5) | 3 | 0.8012 |
| Exposure to smoke, fire and flames | 0 (0-0) | 0 | 1.0000 |
| Contact with heat and hot substances | 1 (0-4) | 1 | 0.8548 |
| Event of undetermined intent | 8 (6-15) | 10 | 0.9727 |
| Accidental poisoning | 14 (5-18) | 8 | 0.3629 |
| Intentional self-harm | 5 (1-11) | 0 | **0.0130** |
| Assault | 1 (0-3) | 0 | 0.2440 |
| Complications of medical and surgical care | 17 (14-33) | 7 | **0.0123** |
| Medical devices associated with adverse incidents in diagnostic and therapeutic use | 0 (0-0) | 0 | 1.0000 |
| Accidents | 0 (0-1) | 0 | 0.6547 |
| Supplementary factors related to causes of morbidity classified elsewhere | 0 (0-1) | 1 | 0.4271 |
| **Factors influencing health status and contact with health services** | | | |
| Resistance to antimicrobial drugs | 5 (3-35) | 8 | 0.2441 |
| Persons encountering health services for examinations | 20 (19-27) | 153 | **0.0000** |
| Persons with potential health hazards related to communicable diseases | 3 (0-5) | 2 | 0.5534 |
| Encounters for other specific health care | 11 (7-73) | 46 | 0.1347 |
| Persons encountering health services in circumstances related to reproduction | 0 (0-1) | 0 | 0.6547 |
| Persons with potential health hazards related to socioeconomic and psychosocial circumstances | 26 (11-35) | 11 | **0.0420** |
| Persons encountering health services in other circumstances | 8 (6-13) | 14 | 0.3082 |
| Family history of primary malignant neoplasm | 2 (1-4) | 2 | 0.6337 |
| Family history of mental and behavioural disorders | 9 (1-14) | 11 | 0.2526 |
| Family history of certain disabilities and chronic diseases (leading to disablement) | 38 (30-47) | 48 | 0.3083 |
| Family history of other specific disorders | 19 (9-24) | 78 | **0.0000** |
| Personal history of malignant neoplasm | 2 (0-4) | 2 | 0.7845 |
| Personal history of certain other diseases | 204 (73-302) | 183 | 0.7483 |
| Allergy status to drugs, medicaments and biological substances | 30 (20-34) | 35 | 0.1626 |
| Acquired absence of limb | 0 (0-1) | 0 | 0.6547 |
| Acquired absence of organs, not elsewhere classified | 7 (1-11) | 22 | **0.0073** |
| Persons with potential health hazards related to family and personal history and certain conditions influencing health status | 8 (2-38) | 25 | **0.0203** |
| Personal risk factors, not elsewhere classified | 25 (17-29) | 18 | 0.4929 |
| Personal history of medical treatment | 25 (21-35) | 68 | **0.0001** |
| Artificial opening status | 27 (15-43) | 18 | 0.2604 |
| Transplanted organ and tissue status | 6 (0-6) | 14 | **0.0098** |
| Presence of cardiac and vascular implants and grafts | 5 (3-8) | 10 | 0.0640 |
| Presence of other functional implants | 6 (1-8) | 4 | 0.7382 |
| Presence of other devices | 1 (0-4) | 0 | 0.1659 |
| Other post-procedural states | 11 (8-14) | 6 | 0.0969 |
| Dependence on enabling machines and devices, not elsewhere classified | 6 (5-11) | 3 | 0.2282 |

Diagnosis at discharge was collated under ICD-10 chapter sub-headings for patients admitted during the 7 weeks of full national lockdown are shown as numbers admitted per week – median (and range). P value represents independent-samples Kruskal-Wallis test controlled for multiple comparisons with stepwise step-down. P values of <0.05 were taken as significant.

Table of changes in numbers of admissions between the first national lockdown period in 2020 and matched period during the previous years for differences. Diagnoses are divided into categories of; infective illnesses, likely sequelae of infective illness, accidental injury, non-specific pains/aches/malaise, likely related to pandemic screening, likely incidental finding or co-morbidity and other diagnoses. * P value calculated using admissions per week with given diagnosis for the 7 weeks of lockdown (2020) or the matched 7 weeks in each of 2015-2019 (n=35 weeks). P values represent independent-samples Kruskal-Wallis test, controlled for multiple comparisons with stepwise step-down. P values of <0.05 were taken as significant and are highlighted in bold.

**Supplemental Table 5: Literature review**

| Publication | Location | Setting | Patient group | Comparator period | Number of previous years examined |
| --- | --- | --- | --- | --- | --- |
| Chong et al., 2020 [1] | Singapore - major paediatric hospital | ED/inpatients | <18 yrs | January 1st to February 6th 2020 | 0 |
| Goldman et al., 2020 [2] | 18 EDs in British Columbia, Canada, serving 60% of the population | ED | 0-16 years | Previous year | 1 |
| Palladino et al., 2020 [3] | Italy | ED | 57 patients 4-14 years | Previous year | 1 |
| Garstang et al., 2020 [4] | Birmingham, UK | Child protection medicals | 47 children <18 years | 2018/2019 | 2 |
| Isba et al., Nov 2020 [5] | Royal Manchester Children's Hospital (UK), and Yale New Haven Children's Hospital (USA) | ED | < 16 years | 2019 | 1 |
| Molina Gutiérrez et al., 2020 [6] | Spain | ED | <18 years | 2019 | 1 |
| Rabbone et al., 2020 [7] | Italy, 53 diabetes centres | Diabetes | < 15 years | 2019 | 1 |
| Sachdeva et al., 2020 [8] | US & Canada | PICU | All PICU (24% over 18) | Early march 2020 | 0 |
| Scaramuzza et al., 2020 [9] | Italy (hospitals in 2 towns) | ED | <15 yrs | 2019 | 1 |
| Roland et al., 2020 [10] | UK/Ireland: 60 children's emergency departments | ED | <16 years | Nil | 0 |
| Mann et al., 2020 [11] | UK: Leicester Royal Infirmary | ED | < 18 yrs | 2019 | 1 |
| Radhika and Madhusudan, 2020 [12] | India: Tamil Nadu | ED | PED | 2019 | 1 |
| Angoulvant et al., 2020 [13] | France - multicentre, 6x PEDs | ED | PED | 2017-2019 | 3 |
| Mahmassani et al., 2020 [14] | Lebanon: single centre | ED | All patients | 3 months prior | 0 |
| Nascimento et al., 2020 [15] | São Paulo, Brazil. | Respiratory admissions | 0-17 yrs | 2015-2019 | 5 |
| Lee et al., 2021 [16] | Boston, Massachusetts, USA; Singapore; Melbourne, Australia; Seattle, Washington, USA; and Paris, France | ED | PED | 2017-2019 | 3 |
| Baxter et al., 2020 [17] | UK: regional multi-trauma centre | paediatric orthopaedic patients | paediatric orthopaedic patients | 2019 | 1 |
| Sperotto et al., 2020 [18] | Northern Italy | PICU | PICU | 2019 | 1 |
| Taddei and Bulgheroni, 2020 [19] | Italy | Child Neurology and Developmental Neuropsychology | Children | None | 0 |
| Friedrich et al., 2020 [20] | Brazil | admissions for acute bronchiolitis | <1 yr | 2016-2019 | 4 |
| Nabian et al., 2020 [21] | Iran: tertiary trauma centre | paediatric fractures | <18yrs | 2018/2019 | 2 |
| Araujo et al., 2020 [22] | Brazil: 15 x PICU | PICU | PICU | 2017-2019 | 3 |
| Dopfer et al., 2020 [23] | Germany: Hanover | ED | PED | 2019 | 1 |
| Williams et al., 2020 [24] | USA: Chapel Hill | acute burn admissions | <18yrs | 2019 | 1 |
| Sugand et al., 2020 [25] | London: St Mary's Hospital | Acute paediatric orthopaedic trauma | <18yrs | 2019 | 1 |
| Sheridan et al., 2020 [26] | Portland, Oregon | Paediatric mental health patients | PED | 2019 | 1 |
| Park et al., 2020 [27] | London: St Mary’s Hospital | Acute paediatric orthopaedic trauma | <18yrs | 2019 | 1 |
| Lazzerini et al., 2020 [28] | Italy - 5 hospitals | ED | < 18 years | 2018/2019 | 2 |
| Dann et al., 2020 [29] | Ireland | ED | PED | 2018/2019 | 2 |
| Jansen and Illy, 2020 [30] | Holland | Questionnaire to paediatricians | children and adolescents | Nil / N/A | 0 / N/A |
| Chaiyachati et al., 2020 [31] | USA: Tertiary ED | ED | <21 yrs | 2017-2019 | 3 |
| Silvagni et al., 2020 [32] | Italian Eds | Pain presentations to ED | PED | 2019 | 1 |
| Ciofi Degli Atti et al., 2020 [33] | Italy | ED | <18 years | Jan-Feb | 0 |
| Pizzol et al., 2020 [34] | Italy: Regina Margherita Children Hospital, Turin | Foreign body ED visits | <14 yrs | 2016-2019 | 4 |
| Akuaake et al., 2020 [35] | Cape Town, South Africa | ED | <13 years | 2019 | 1 |
| Isba et al., May 2020 [36] | Manchester, UK | ED | PED | 2019 | 1 |
| Bressan et al., 2020 [37] | Italy | ED domestic accident presentations | PED | 2019 | 1 |
| Bhopal et al., 2020 [38] | North East of England | Safeguarding referral | <16 yrs | 2018/2019 | 2 |
| Ashton et al., 2020 [39] | UK | IBD | <18 yrs | Nil | 0 |
| Williams et al., 2021 [40] | Scotland | ED/inpatients/PICU | <16 yrs | 2016-2019 | 4 |
| Sidpra et al., 2020 [41] | UK: London | Abusive head trauma | Children | 2017-2019 | 3 |

Literature findings from PubMed title/abstract search on 9th January 2021, was conducted for articles published in any language since 1st December 2019 filtered for human studies with age ≤18 years, using the search string “COVID”, AND “lockdown”, AND “paediatric”, “children”, AND “attendance”, “admission”. Studies identified through reviews and references were also included. N=41 primary research articles were identified (above) relating to relating to changes in paediatric healthcare usage during a period of national or regional lockdown, excluding primary SARS-CoV-2 infection.

**References** for supplemental table 6:

1 Chong S-L, Soo JSL, Allen JC, *et al.* Impact of COVID-19 on pediatric emergencies and hospitalizations in Singapore. *BMC Pediatr* 2020;**20**:562. doi:10.1186/s12887-020-02469-z

2 Goldman RD, Grafstein E, Barclay N, *et al.* Paediatric patients seen in 18 emergency departments during the COVID-19 pandemic. *Emerg Med J* 2020;:emermed-2020-210273. doi:10.1136/emermed-2020-210273

3 Palladino F, Merolla E, Solimeno M, *et al.* Is Covid-19 lockdown related to an increase of accesses for seizures in the emergency department? An observational analysis of a paediatric cohort in the Southern Italy. *Neurol Sci* 2020;**41**:3475–83. doi:10.1007/s10072-020-04824-5

4 Garstang J, Debelle G, Anand I, *et al.* Effect of COVID-19 lockdown on child protection medical assessments: a retrospective observational study in Birmingham, UK. *BMJ Open* 2020;**10**:e042867. doi:10.1136/bmjopen-2020-042867

5 Isba R, Edge R, Auerbach M, *et al.* COVID-19: Transatlantic Declines in Pediatric Emergency Admissions. *Pediatr Emerg Care* 2020;**36**:551–3. doi:10.1097/PEC.0000000000002260

6 Molina Gutiérrez MÁ, Ruiz Domínguez JA, Bueno Barriocanal M, *et al.* Impacto de la pandemia COVID-19 en urgencias: primeros hallazgos en un hospital de Madrid. *Anales de Pediatría* 2020;**93**:313–22. doi:10.1016/j.anpedi.2020.06.021

7 Rabbone I, Schiaffini R, Cherubini V, *et al.* Has COVID-19 Delayed the Diagnosis and Worsened the Presentation of Type 1 Diabetes in Children? *Dia Care* 2020;**43**:2870–2. doi:10.2337/dc20-1321

8 Sachdeva R, Rice TB, Reisner B, *et al.* The Impact of Coronavirus Disease 2019 Pandemic on U.S. and Canadian PICUs. *Pediatric Critical Care Medicine* 2020;**21**:e643–50. doi:10.1097/PCC.0000000000002510

9 Scaramuzza A, Tagliaferri F, Bonetti L, *et al.* Changing admission patterns in paediatric emergency departments during the COVID-19 pandemic. *Arch Dis Child* 2020;**105**:704.2-706. doi:10.1136/archdischild-2020-319397

10 Roland D, Harwood R, Bishop N, *et al.* Children’s emergency presentations during the COVID-19 pandemic. *The Lancet Child & Adolescent Health* 2020;**4**:e32–3. doi:10.1016/S2352-4642(20)30206-6

11 Mann JA, Patel N, Bragg J, *et al.* Did children ‘stay safe’? Evaluation of burns presentations to a children’s emergency department during the period of COVID-19 school closures. *Arch Dis Child* 2020;:archdischild-2020-320015. doi:10.1136/archdischild-2020-320015

12 Raman R, Madhusudan M. Impact of the COVID-19 Pandemic on Admissions to the Pediatric Emergency Department in a Tertiary Care Hospital. *Indian J Pediatr* Published Online First: 4 November 2020. doi:10.1007/s12098-020-03562-y

13 Angoulvant F, Ouldali N, Yang DD, *et al.* Coronavirus Disease 2019 Pandemic: Impact Caused by School Closure and National Lockdown on Pediatric Visits and Admissions for Viral and Nonviral Infections—a Time Series Analysis. *Clinical Infectious Diseases* 2020;:ciaa710. doi:10.1093/cid/ciaa710

14 Mahmassani D, Tamim H, Makki M, *et al.* The impact of COVID-19 lockdown measures on ED visits in Lebanon. *The American Journal of Emergency Medicine* 2020;:S0735675720310962. doi:10.1016/j.ajem.2020.11.067

15 Nascimento MS, Baggio DM, Fascina LP, *et al.* Impact of social isolation due to COVID-19 on the seasonality of pediatric respiratory diseases. *PLoS ONE* 2020;**15**:e0243694. doi:10.1371/journal.pone.0243694

16 Lee L, Mannix R, Guedj R, *et al.* Paediatric ED utilisation in the early phase of the COVID-19 pandemic. *Emerg Med J* 2021;**38**:100–2. doi:10.1136/emermed-2020-210124

17 Baxter I, Hancock G, Clark M, *et al.* Paediatric orthopaedics in lockdown: A study on the effect of the SARS-Cov-2 pandemic on acute paediatric orthopaedics and trauma. *Bone & Joint Open* 2020;**1**:424–30. doi:10.1302/2633-1462.17.BJO-2020-0086.R1

18 Sperotto F, Wolfler A, Biban P, *et al.* Unplanned and medical admissions to pediatric intensive care units significantly decreased during COVID-19 outbreak in Northern Italy. *Eur J Pediatr* 2021;**180**:643–8. doi:10.1007/s00431-020-03832-z

19 Taddei M, Bulgheroni S. Facing the real time challenges of the COVID-19 emergency for child neuropsychology service in Milan. *Research in Developmental Disabilities* 2020;**107**:103786. doi:10.1016/j.ridd.2020.103786

20 Friedrich F, Ongaratto R, Scotta MC, *et al.* Early Impact of Social Distancing in Response to Coronavirus Disease 2019 on Hospitalizations for Acute Bronchiolitis in Infants in Brazil. *Clinical Infectious Diseases* 2020;:ciaa1458. doi:10.1093/cid/ciaa1458

21 Nabian MH, Vosoughi F, Najafi F, *et al.* Epidemiological pattern of pediatric trauma in COVID-19 outbreak: Data from a tertiary trauma center in Iran. *Injury* 2020;**51**:2811–5. doi:10.1016/j.injury.2020.09.015

22 Araujo OR de, Almeida CG de, Lima-Setta F, *et al.* The Impact of the Novel Coronavirus on Brazilian PICUs. *Pediatr Crit Care Med* 2020;**21**:1059–63. doi:10.1097/PCC.0000000000002583

23 Dopfer C, Wetzke M, Zychlinsky Scharff A, *et al.* COVID-19 related reduction in pediatric emergency healthcare utilization – a concerning trend. *BMC Pediatr* 2020;**20**:427. doi:10.1186/s12887-020-02303-6

24 Williams FN, Chrisco L, Nizamani R, *et al.* COVID-19 related admissions to a regional burn center: The impact of shelter-in-place mandate. *Burns Open* 2020;**4**:158–9. doi:10.1016/j.burnso.2020.07.004

25 Sugand K, Park C, Morgan C, *et al.* Impact of the COVID-19 pandemic on paediatric orthopaedic trauma workload in central London: a multi-centre longitudinal observational study over the “golden weeks”: The COVid Emergency Related Trauma and orthopaedics (COVERT) Collaborative. *Acta Orthopaedica* 2020;**91**:633–8. doi:10.1080/17453674.2020.1807092

26 Sheridan DC, Cloutier R, Johnson K, *et al.* Where have all the emergency paediatric mental health patients gone during COVID-19? *Acta Paediatr* Published Online First: 16 August 2020. doi:10.1111/apa.15537

27 Park C, Sugand K, Nathwani D, *et al.* Impact of the COVID-19 pandemic on orthopedic trauma workload in a London level 1 trauma center: the ‘golden month’. *Acta Orthop* 2020;**91**:556–61. doi:10.1080/17453674.2020.1783621

28 Lazzerini M, Barbi E, Apicella A, *et al.* Delayed access or provision of care in Italy resulting from fear of COVID-19. *The Lancet Child & Adolescent Health* 2020;**4**:e10–1. doi:10.1016/S2352-4642(20)30108-5

29 Dann L, Fitzsimons J, Gorman KM, *et al.* Disappearing act: COVID-19 and paediatric emergency department attendances. *Arch Dis Child* 2020;**105**:810–1. doi:10.1136/archdischild-2020-319654

30 Jansen DEMC, Illy KE. Delayed presentation to regular Dutch paediatric care in COVID-19 times: a national survey. *BMJ Paediatr Open* 2020;**4**:e000834. doi:10.1136/bmjpo-2020-000834

31 Chaiyachati BH, Agawu A, Zorc JJ, *et al.* Trends in Pediatric Emergency Department Utilization after Institution of Coronavirus Disease-19 Mandatory Social Distancing. *The Journal of Pediatrics* 2020;**226**:274-277.e1. doi:10.1016/j.jpeds.2020.07.048

32 Silvagni D, Milani GP, Benini F. Children and the Use of Emergency Departments During the COVID-19 Pandemic: Where Did the Pain End Up? *Pediatric Emergency Care* 2020;**Publish Ahead of Print**. doi:10.1097/PEC.0000000000002256

33 Ciofi Degli Atti ML, Campana A, Muda AO, *et al.* Facing SARS-CoV-2 Pandemic at a COVID-19 Regional Children’s Hospital in Italy. *Pediatr Infect Dis J* 2020;**39**:e221–5. doi:10.1097/INF.0000000000002811

34 Pizzol A, Rigazio C, Calvo PL, *et al.* Foreign-body Ingestions in Children During COVID-19 Pandemic in a Pediatric Referral Center. *JPGN Rep* 2020;**1**:e018. doi:10.1097/PG9.0000000000000018

35 Akuaake LM, Hendrikse C, Spittal G, *et al.* Cross-sectional study of paediatric case mix presenting to an emergency centre in Cape Town, South Africa, during COVID-19. *bmjpo* 2020;**4**:e000801. doi:10.1136/bmjpo-2020-000801

36 Isba R, Edge R, Jenner R, *et al.* Where have all the children gone? Decreases in paediatric emergency department attendances at the start of the COVID-19 pandemic of 2020. *Arch Dis Child* 2020;**105**:704.1-704. doi:10.1136/archdischild-2020-319385

37 Bressan S, Gallo E, Tirelli F, *et al.* Lockdown: more domestic accidents than COVID-19 in children. *Arch Dis Child* 2020;:archdischild-2020-319547. doi:10.1136/archdischild-2020-319547

38 Bhopal S, Buckland A, McCrone R, *et al.* Who has been missed? Dramatic decrease in numbers of children seen for child protection assessments during the pandemic. *Arch Dis Child* 2020;:archdischild-2020-319783. doi:10.1136/archdischild-2020-319783

39 Ashton JJ, Kammermeier J, Spray C, *et al.* Impact of COVID-19 on diagnosis and management of paediatric inflammatory bowel disease during lockdown: a UK nationwide study. *Arch Dis Child* 2020;**105**:1186–91. doi:10.1136/archdischild-2020-319751

40 Williams TC, MacRae C, Swann OV, *et al.* Indirect effects of the COVID-19 pandemic on paediatric healthcare use and severe disease: a retrospective national cohort study. *Arch Dis Child* 2021;:archdischild-2020-321008. doi:10.1136/archdischild-2020-321008

41 Sidpra J, Abomeli D, Hameed B, *et al.* Rise in the incidence of abusive head trauma during the COVID-19 pandemic. *Arch Dis Child* 2020;:archdischild-2020-319872. doi:10.1136/archdischild-2020-319872
